# Supplementary material for: Next-generation ELISA diagnostic assay for Chagas Disease based on the combination of short peptidic epitopes
Source: PubMed Central journal article supplement (PMC5648266; doi:10.1371/journal.pntd.0005972), 2017-10-09

**Tc00.1047053507071.20**  
mucin-associated surface protein (MASP)

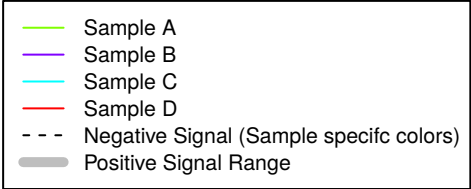

LQVAGIKTTTATTGDS  
p1

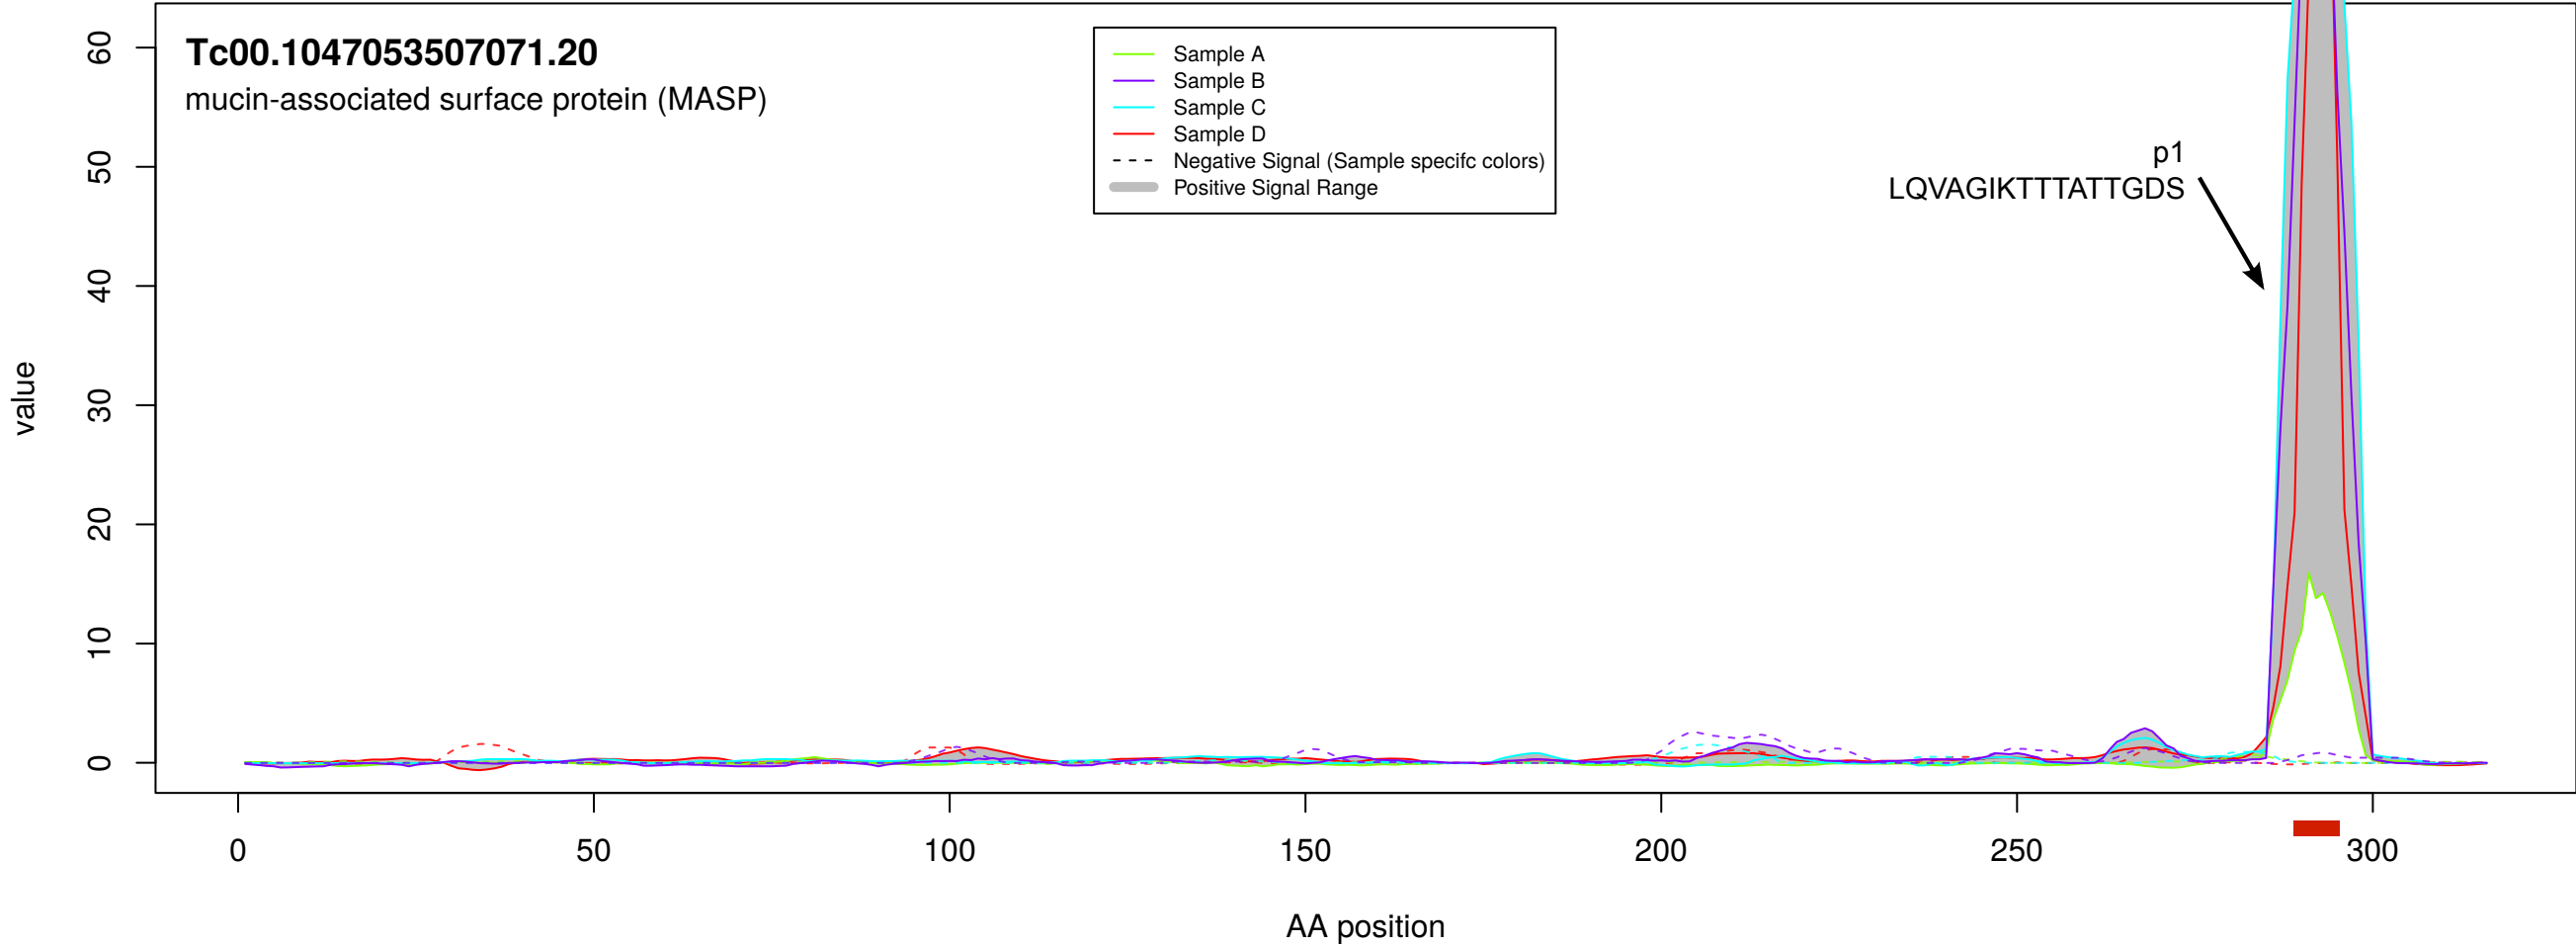

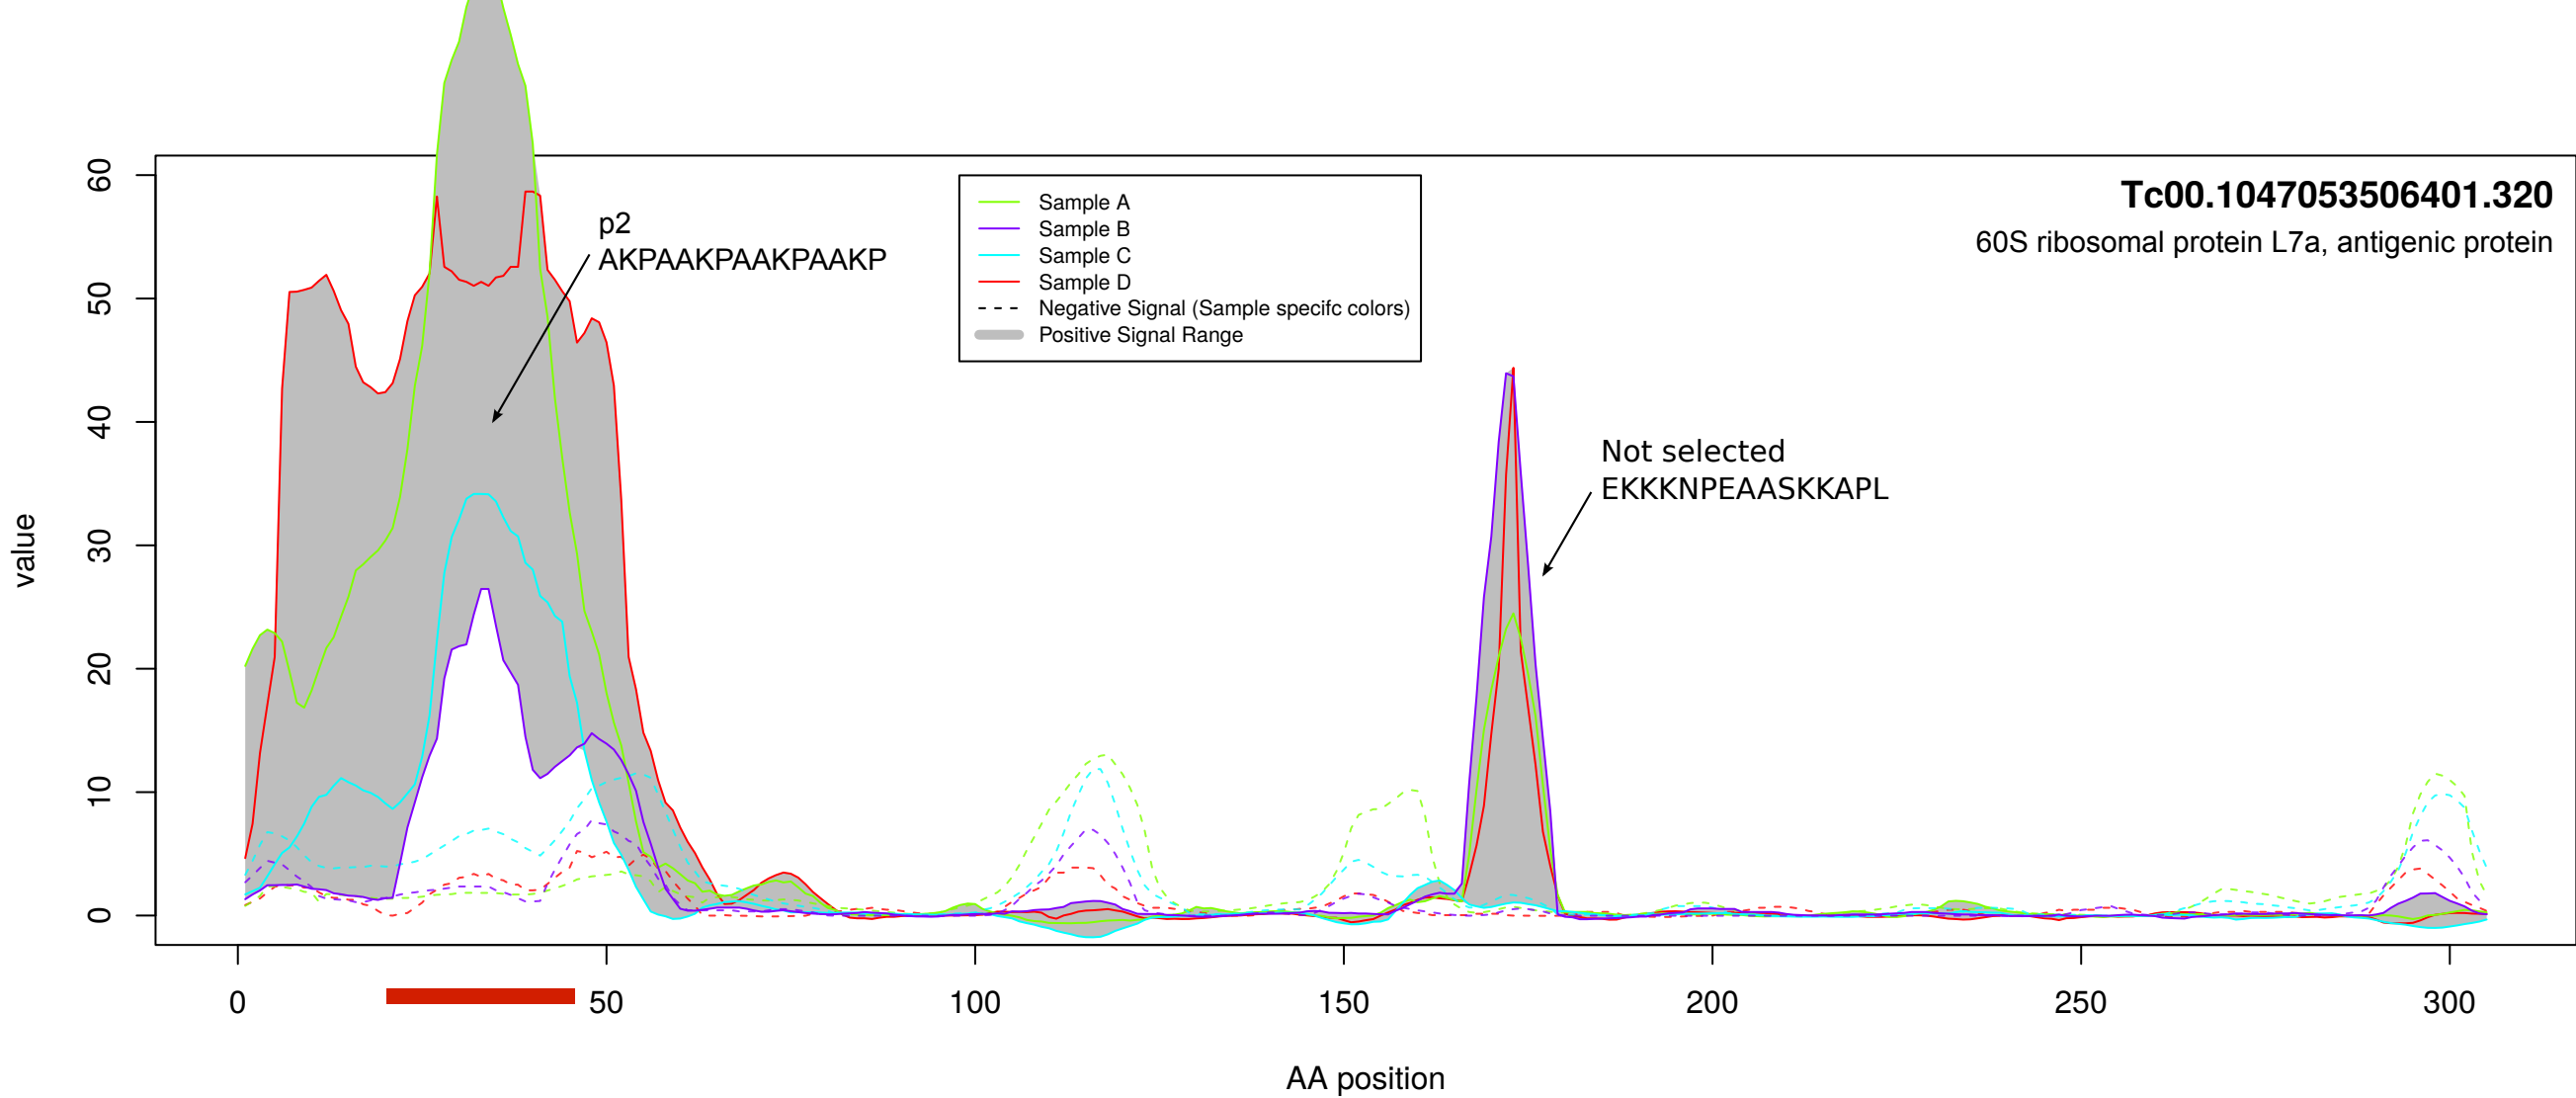

# Tc00.1047053506973.30

mucin-associated surface protein (MASP)

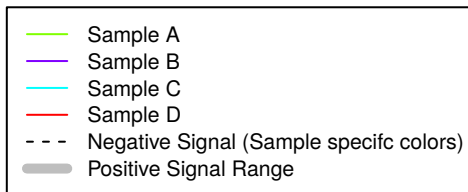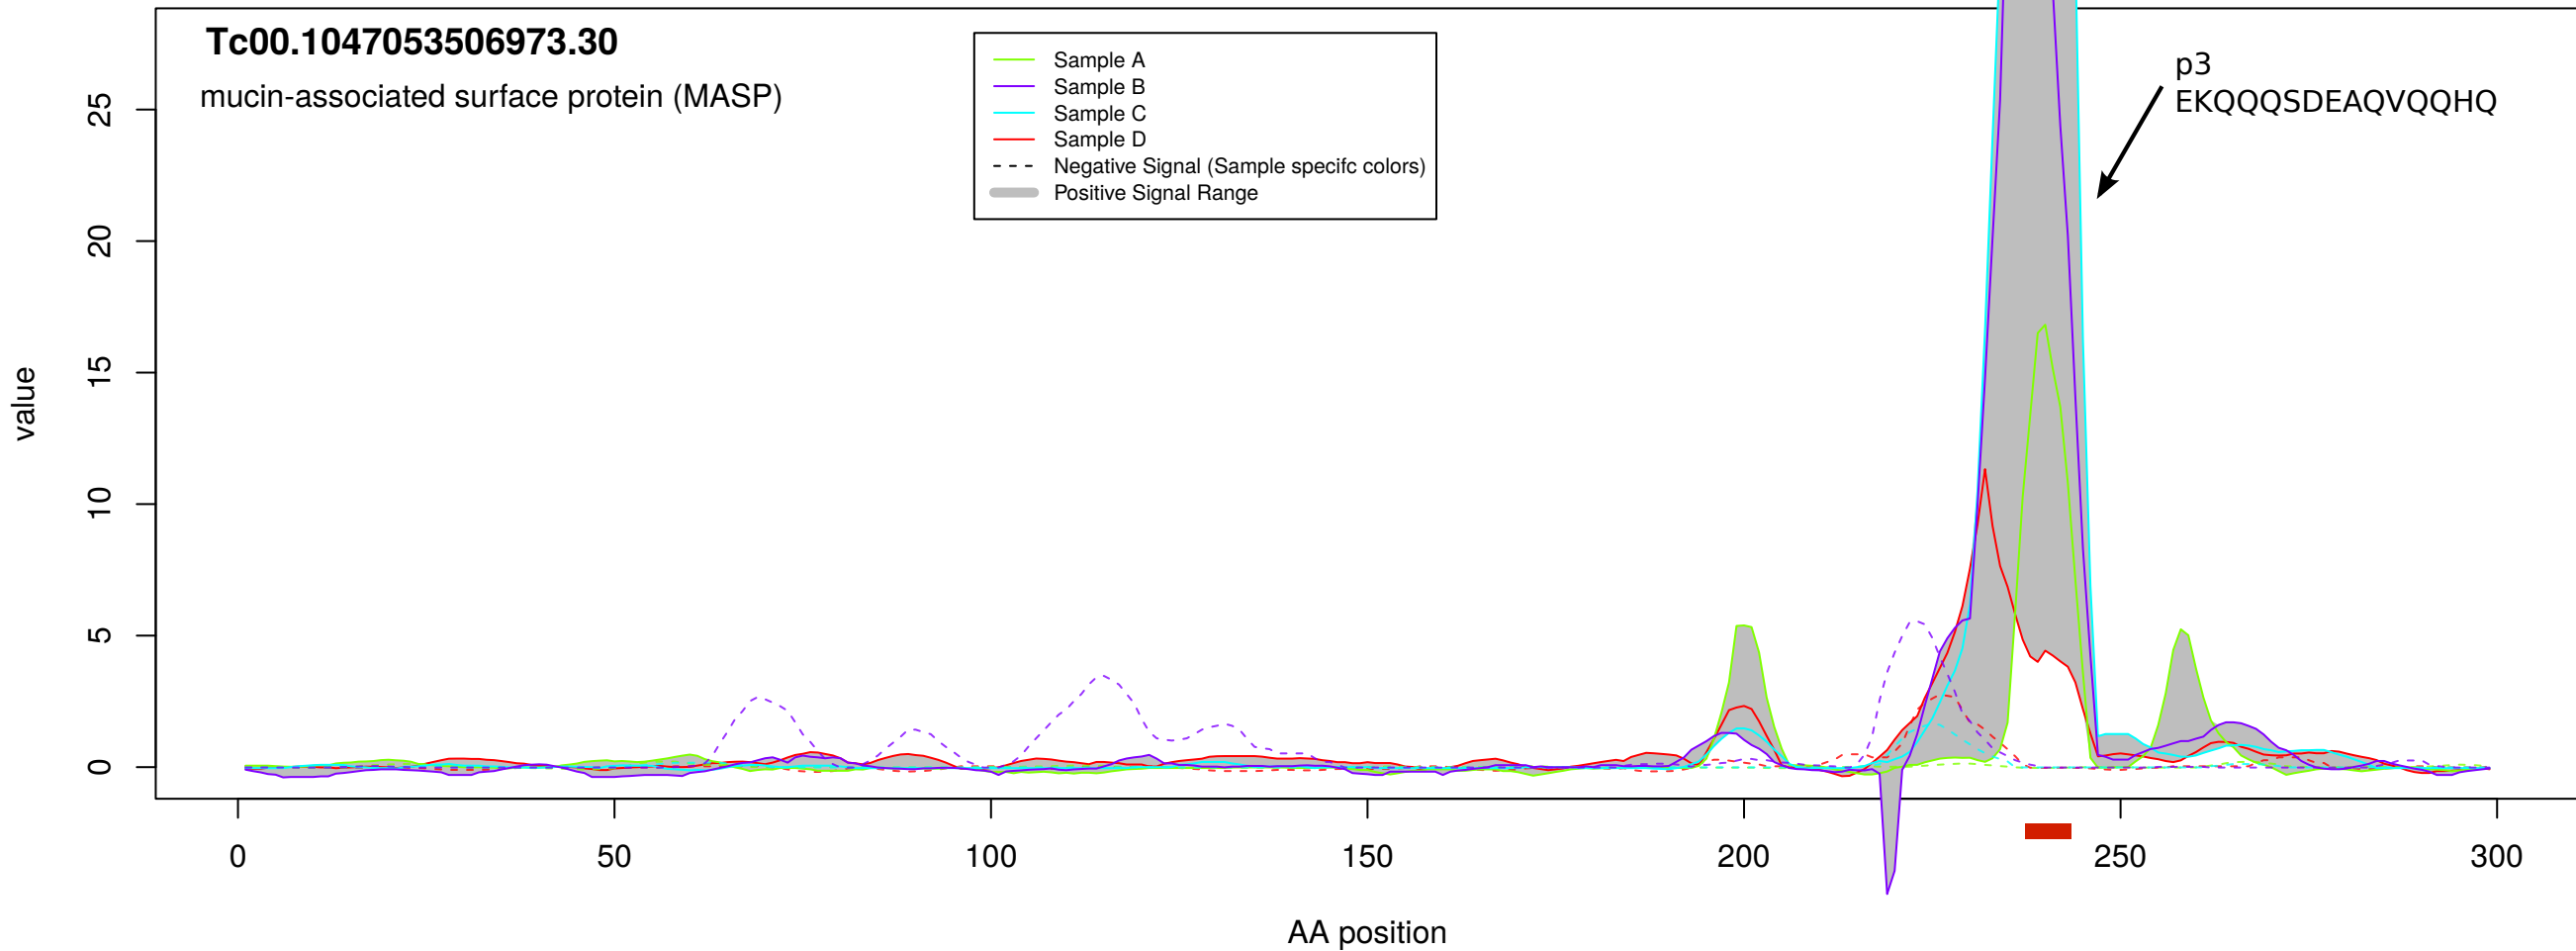

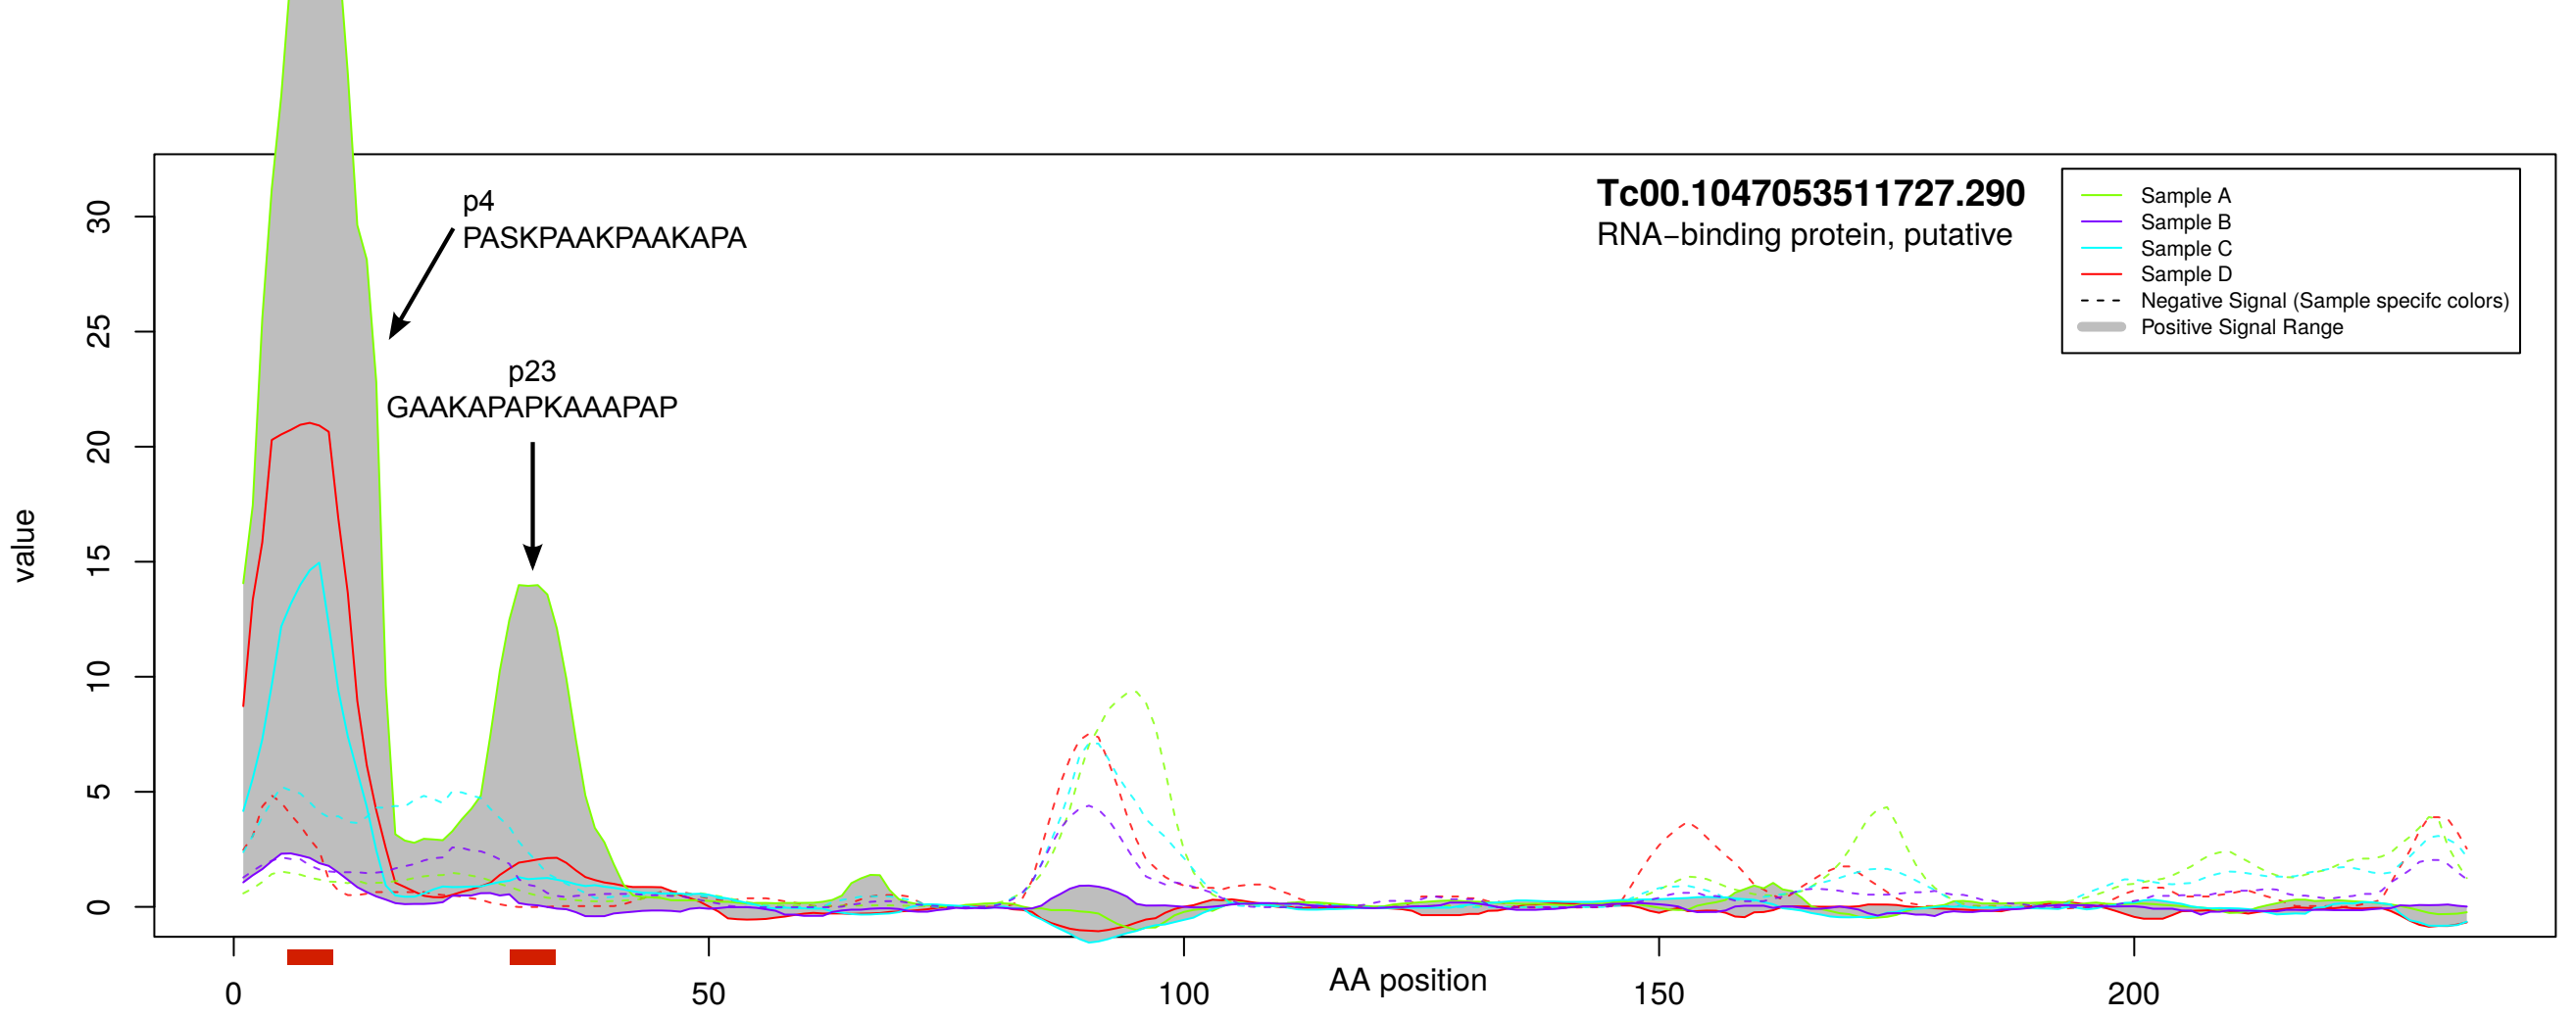

**Tc00.1047053507083.109**  
hypothetical protein, conserved

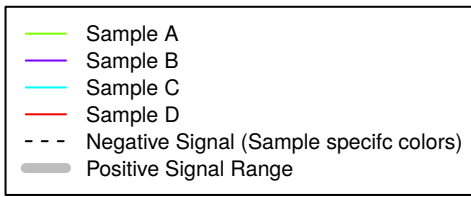

WFEREVDGHDFIREH  
p5

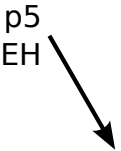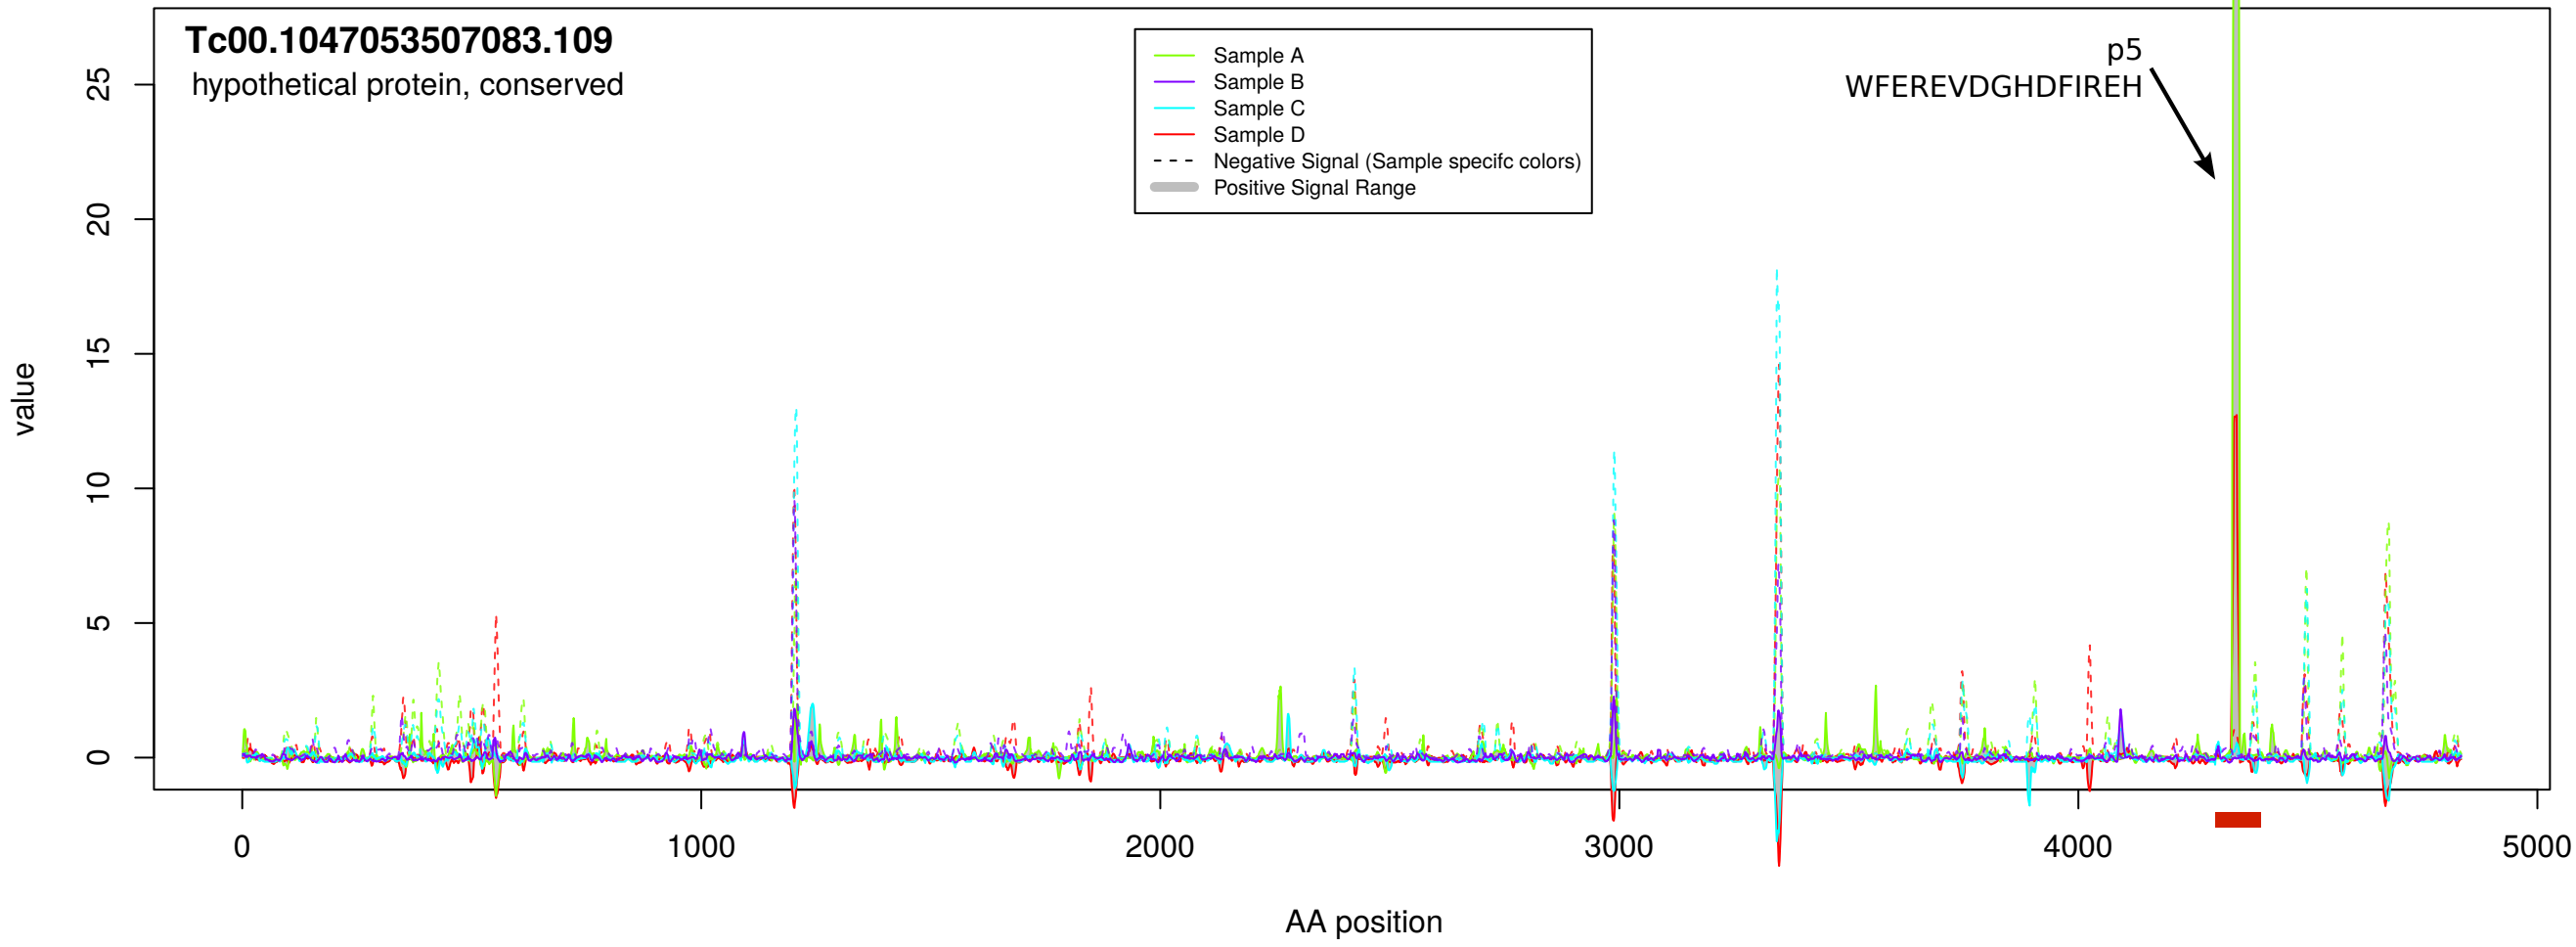

**Tc00.1047053507071.170**

mucin TcMUCII, putative

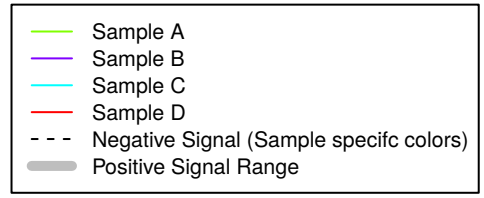

TTNAPSRLREIDGSL

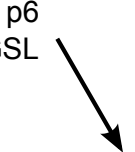

p6

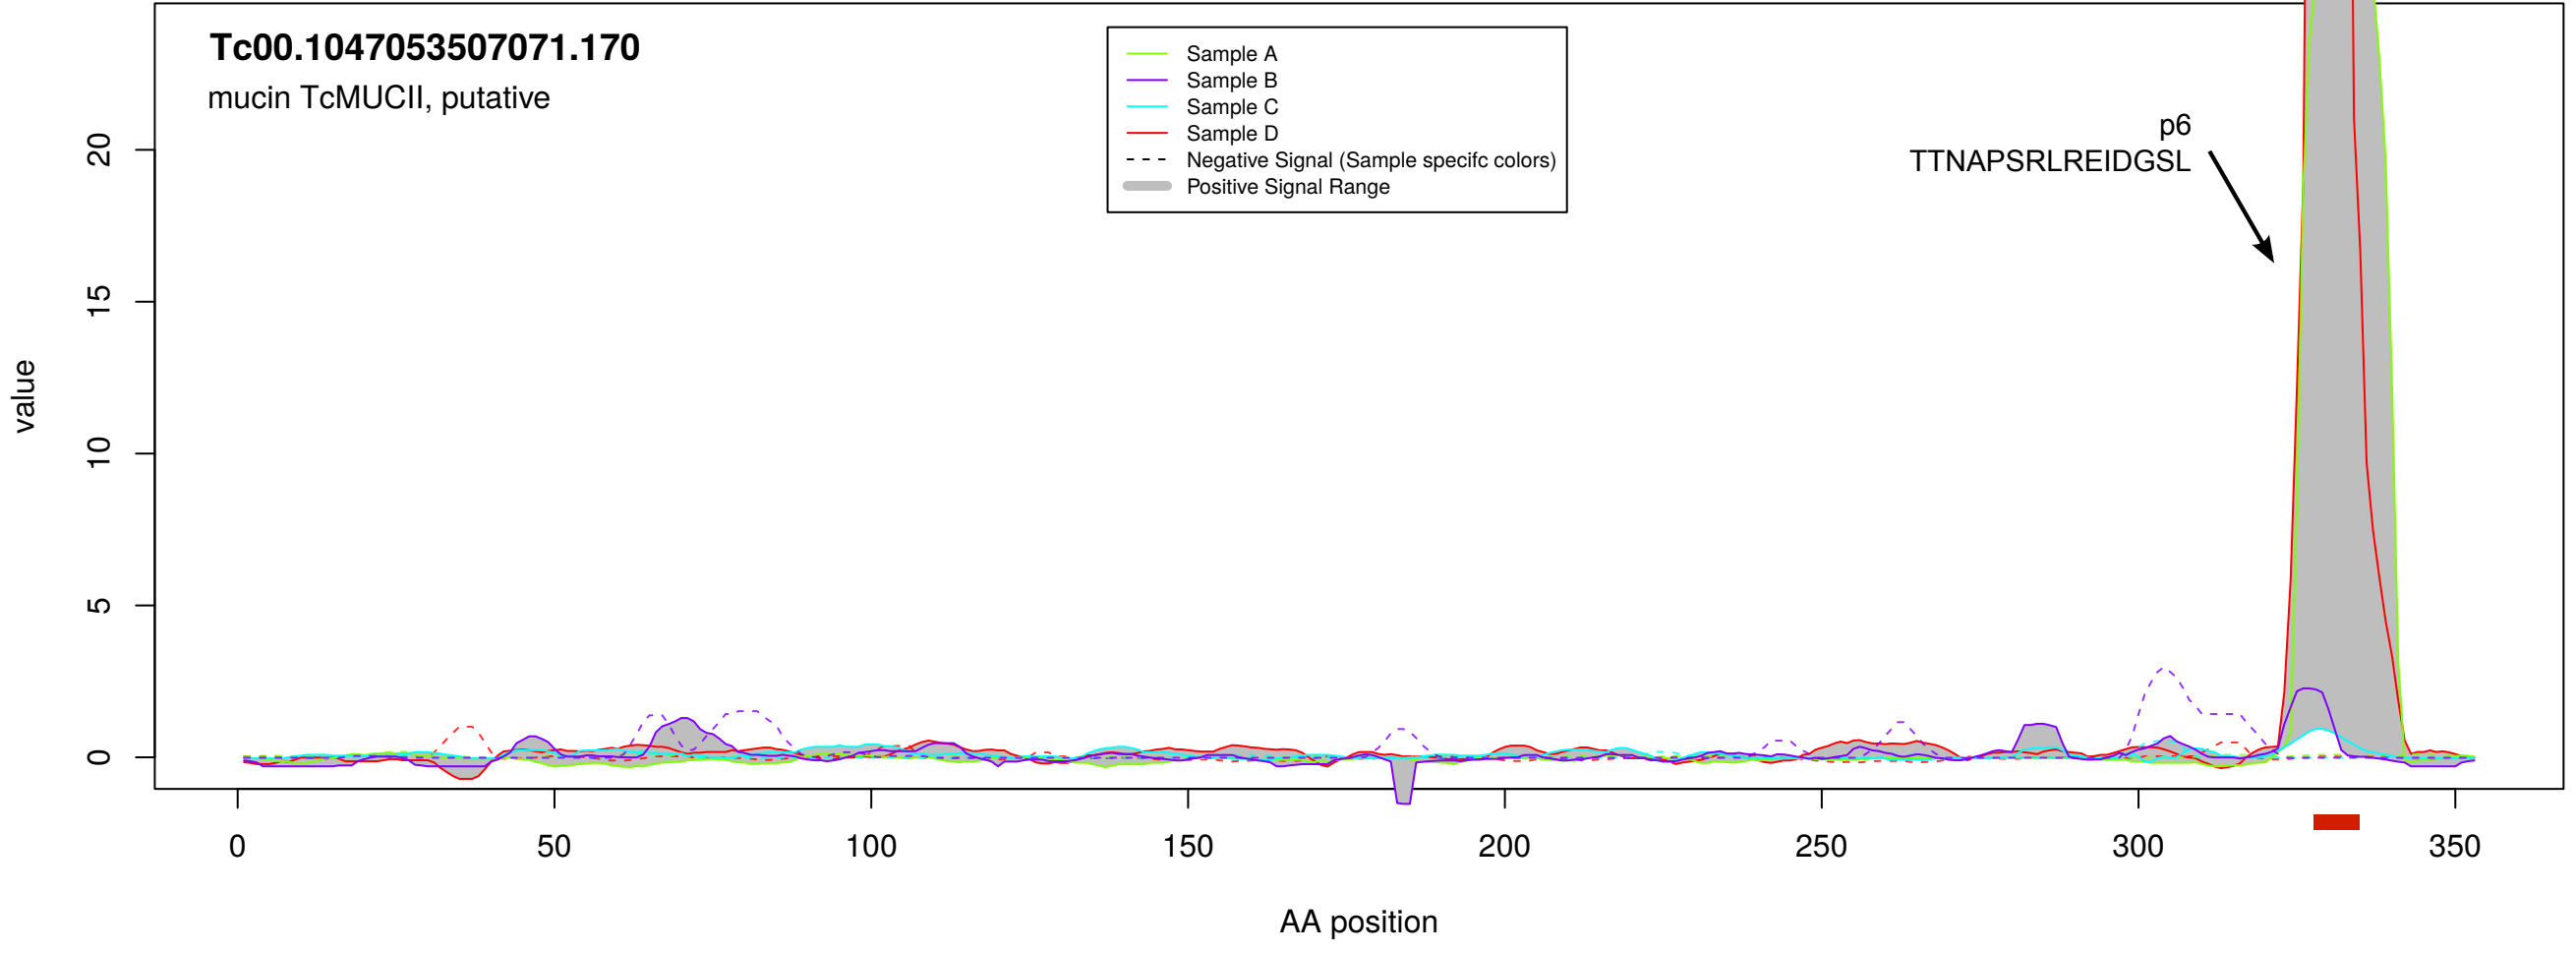



Tc00.1047053510101.430  
40S ribosomal protein S21, putative

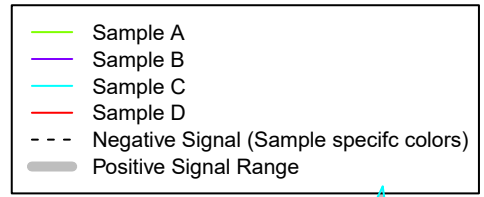

p8 - GRDAPQARKQQGRNE

GRDAPQARKQQ  
Smaller p8 core repeated here

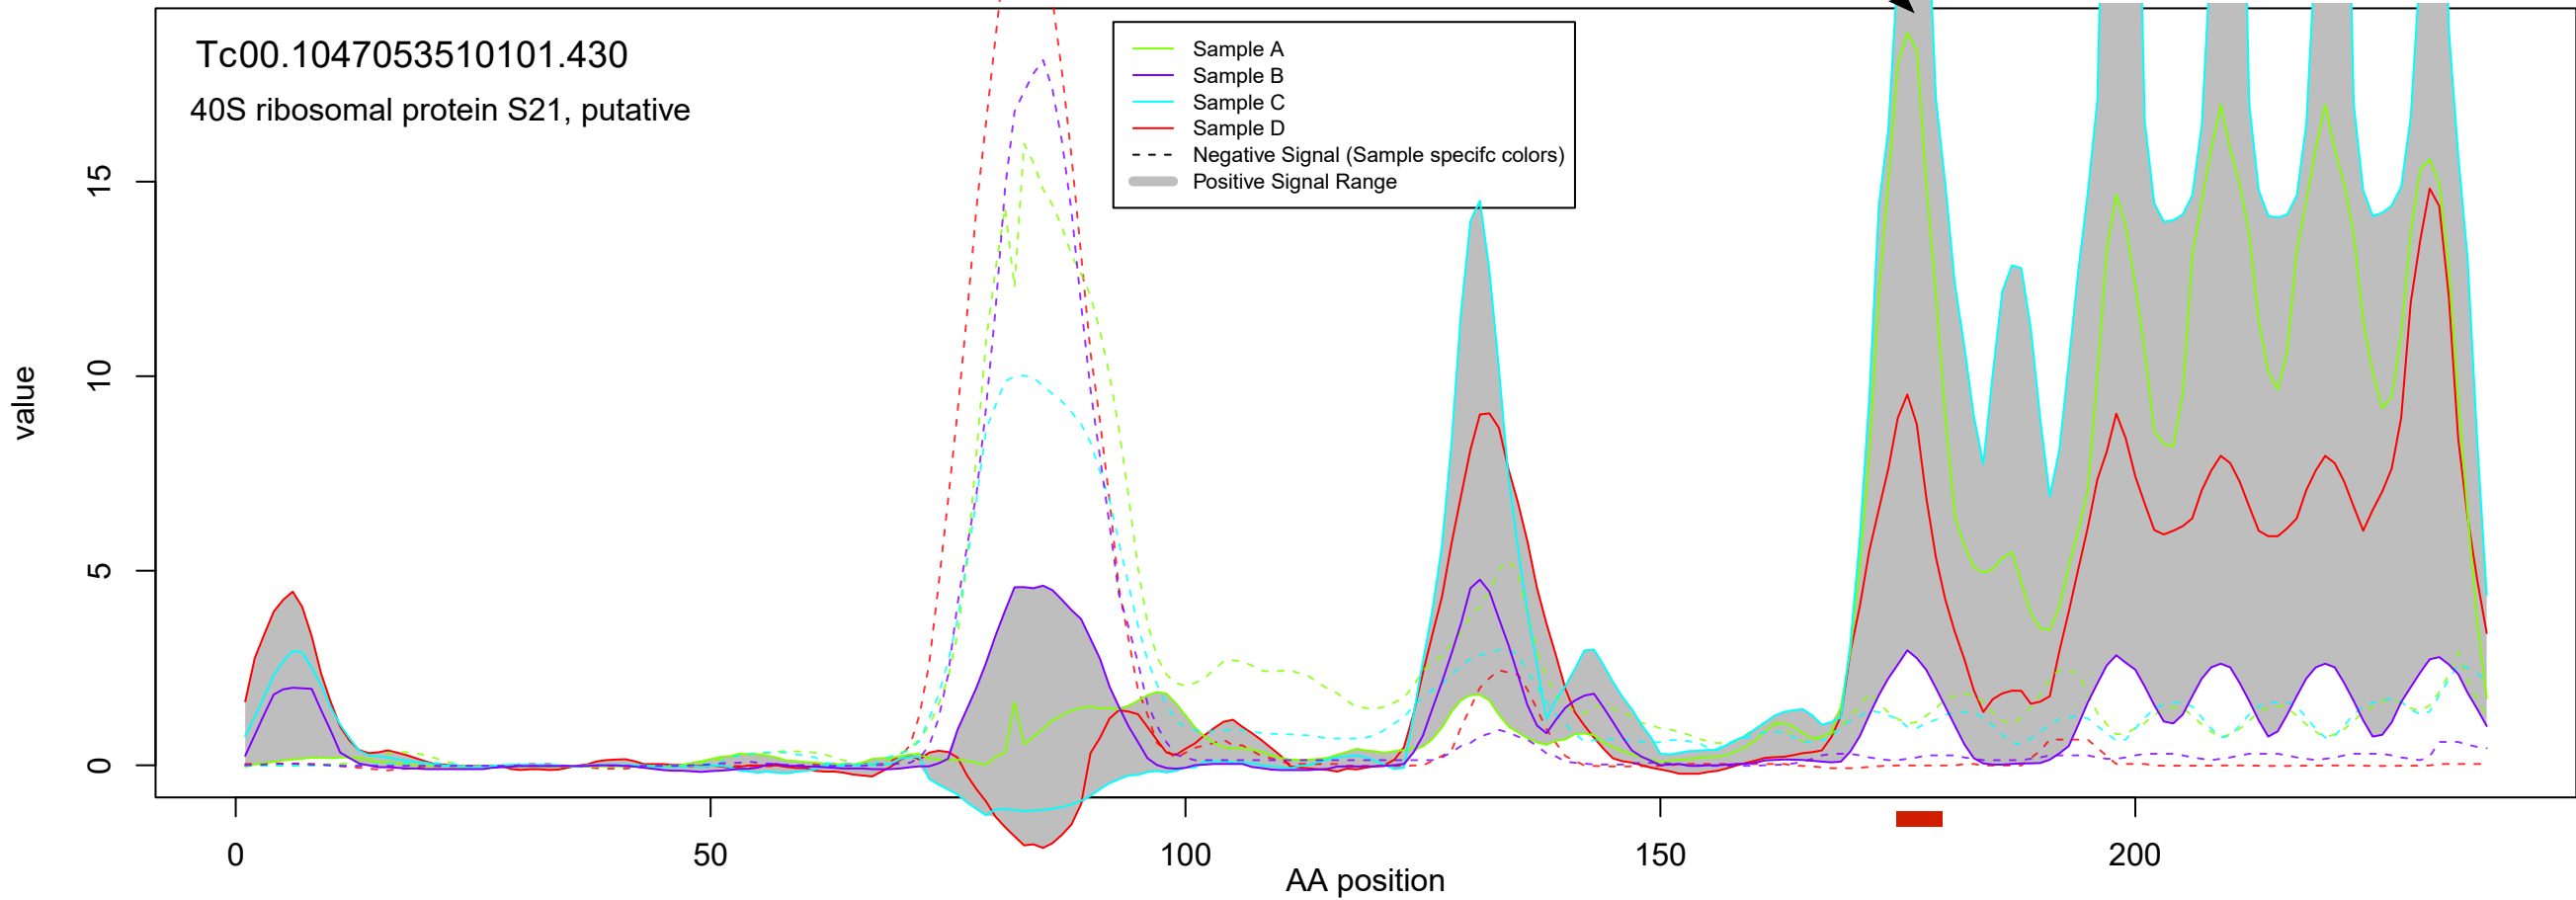



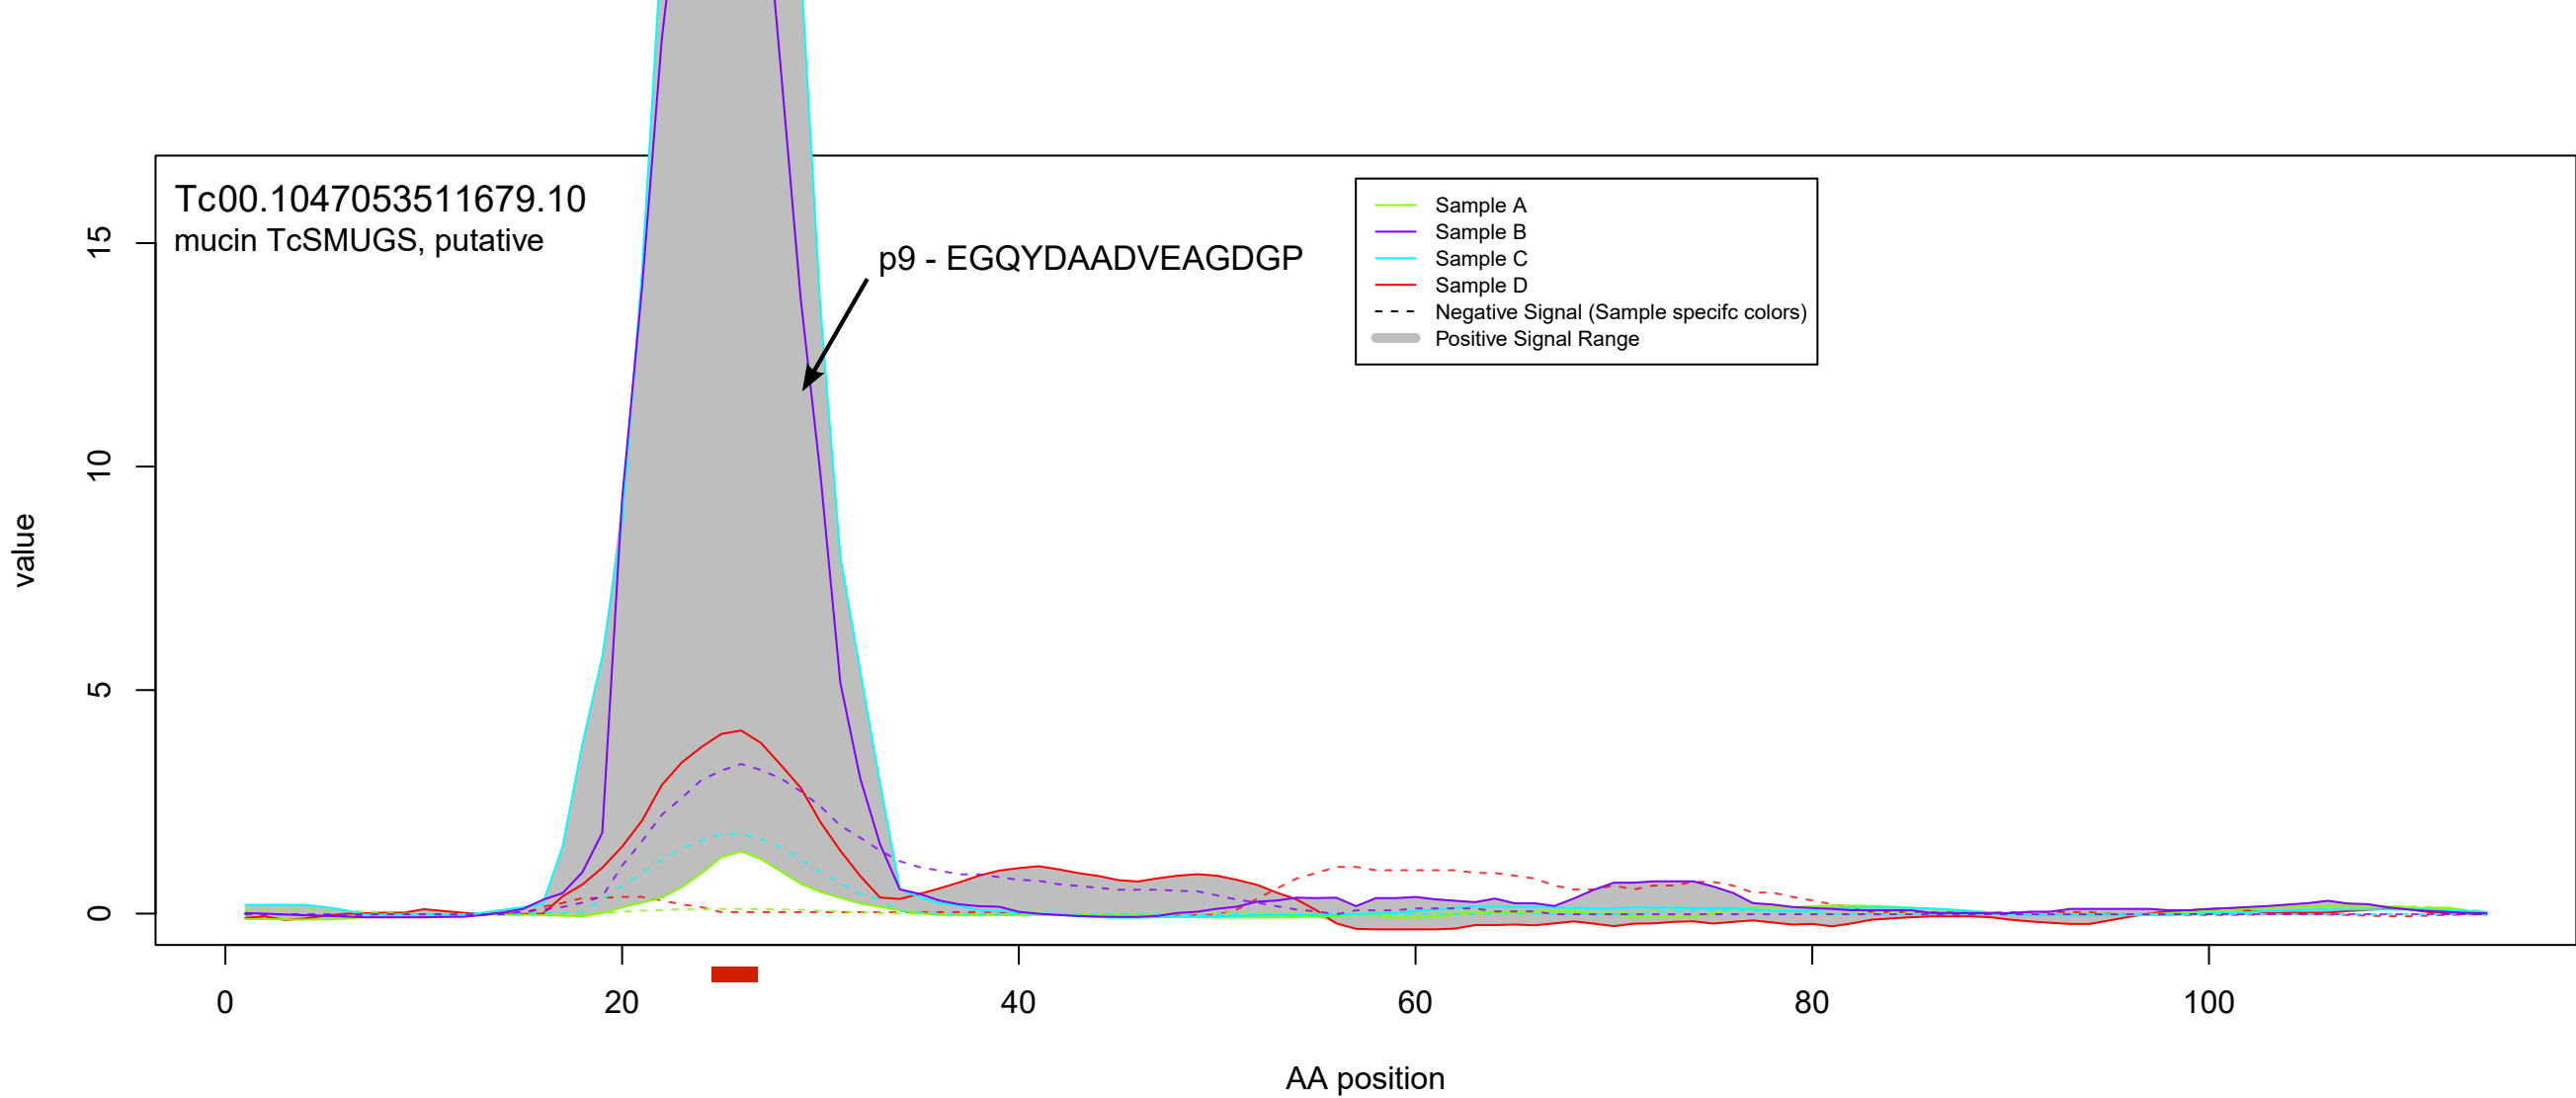

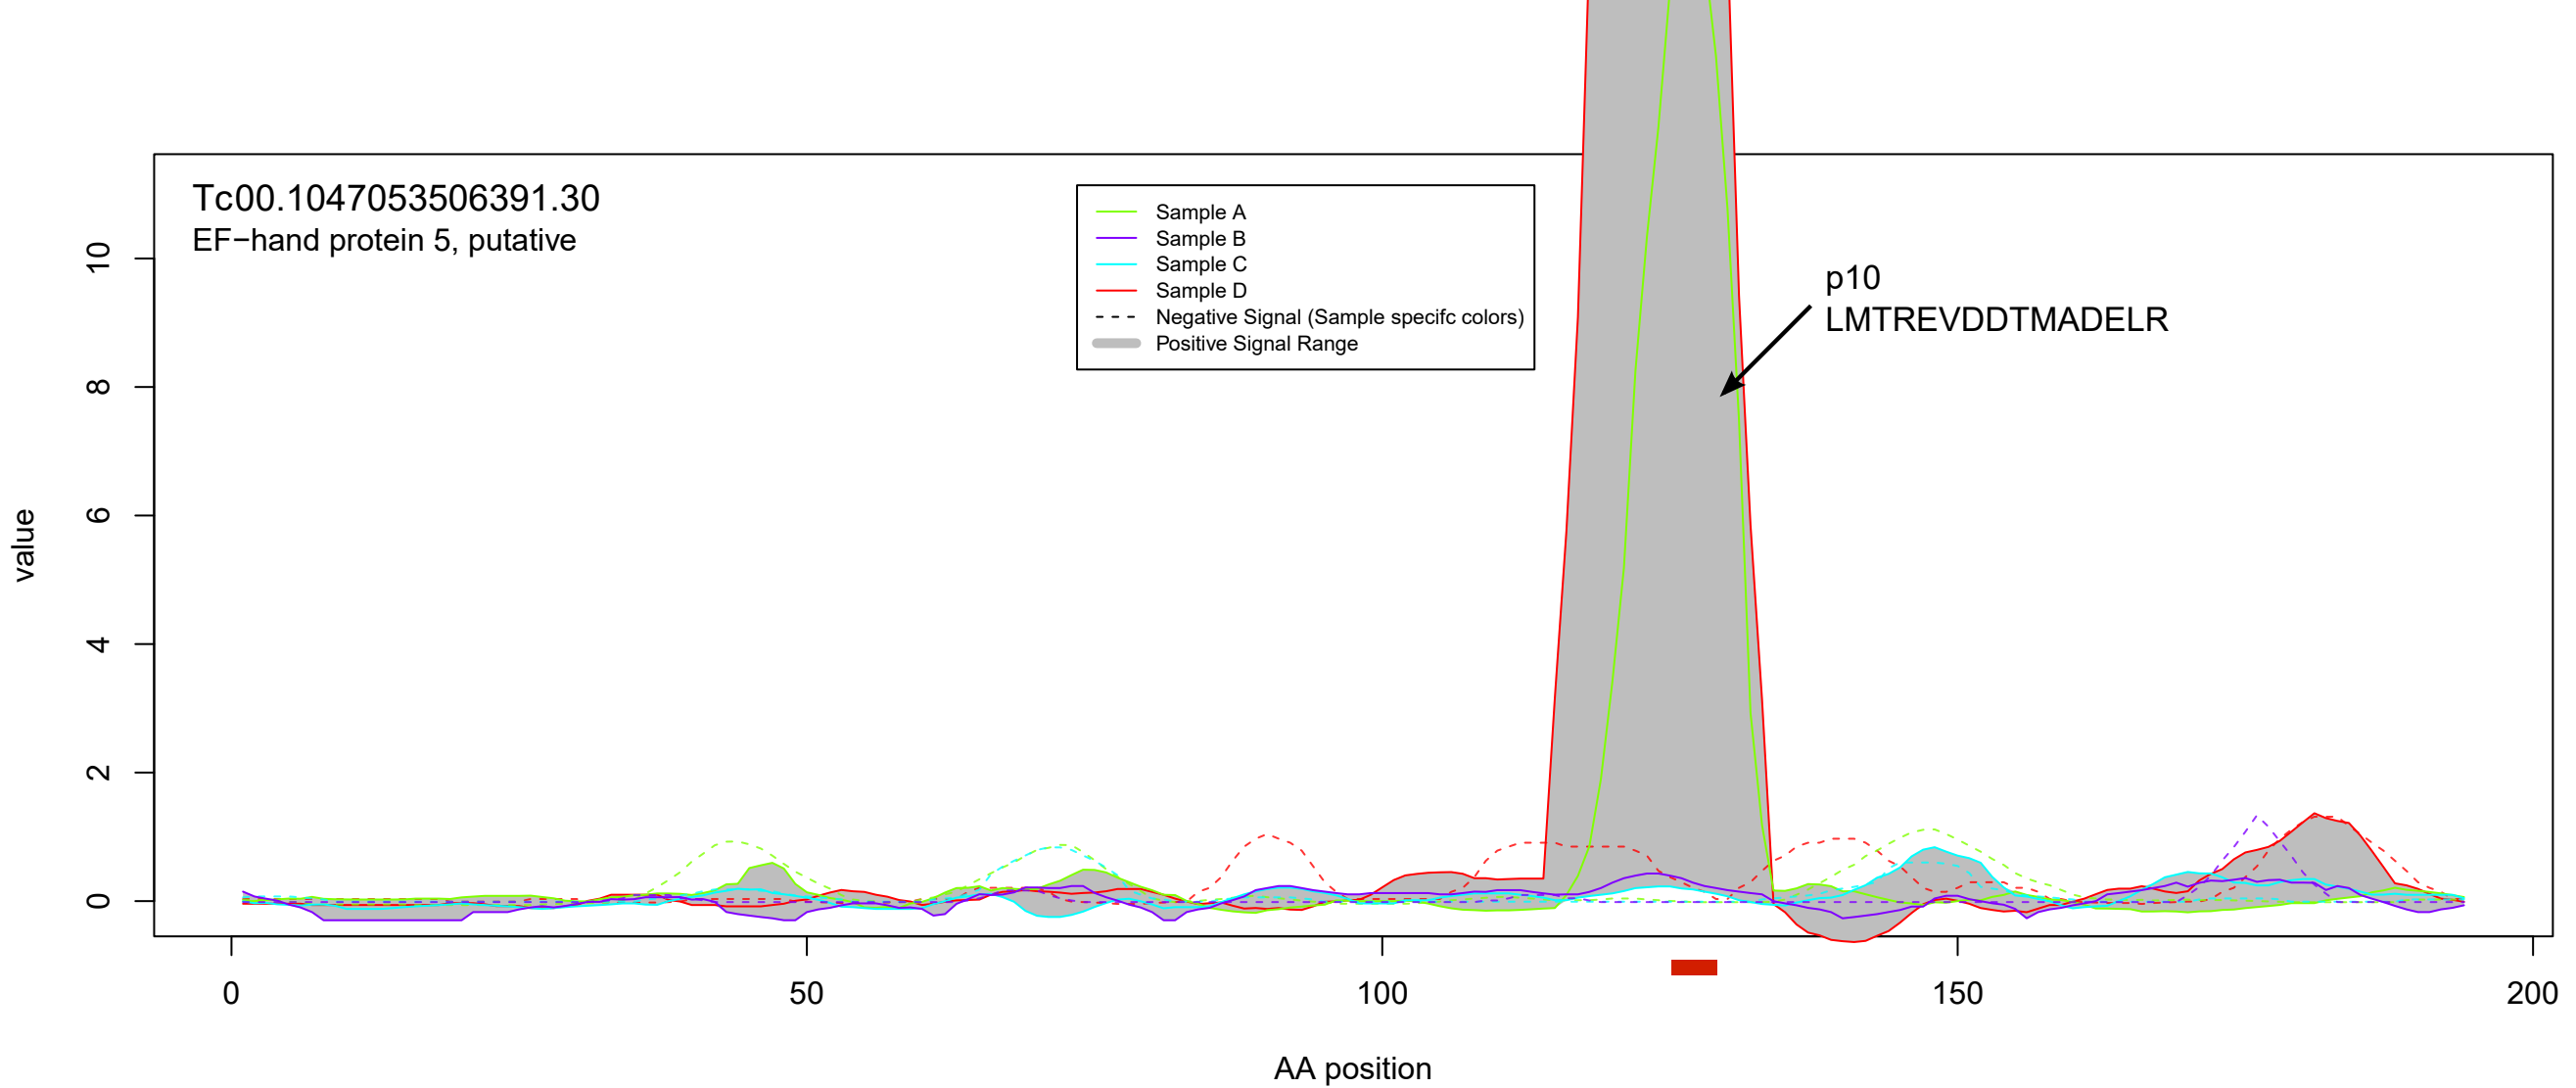



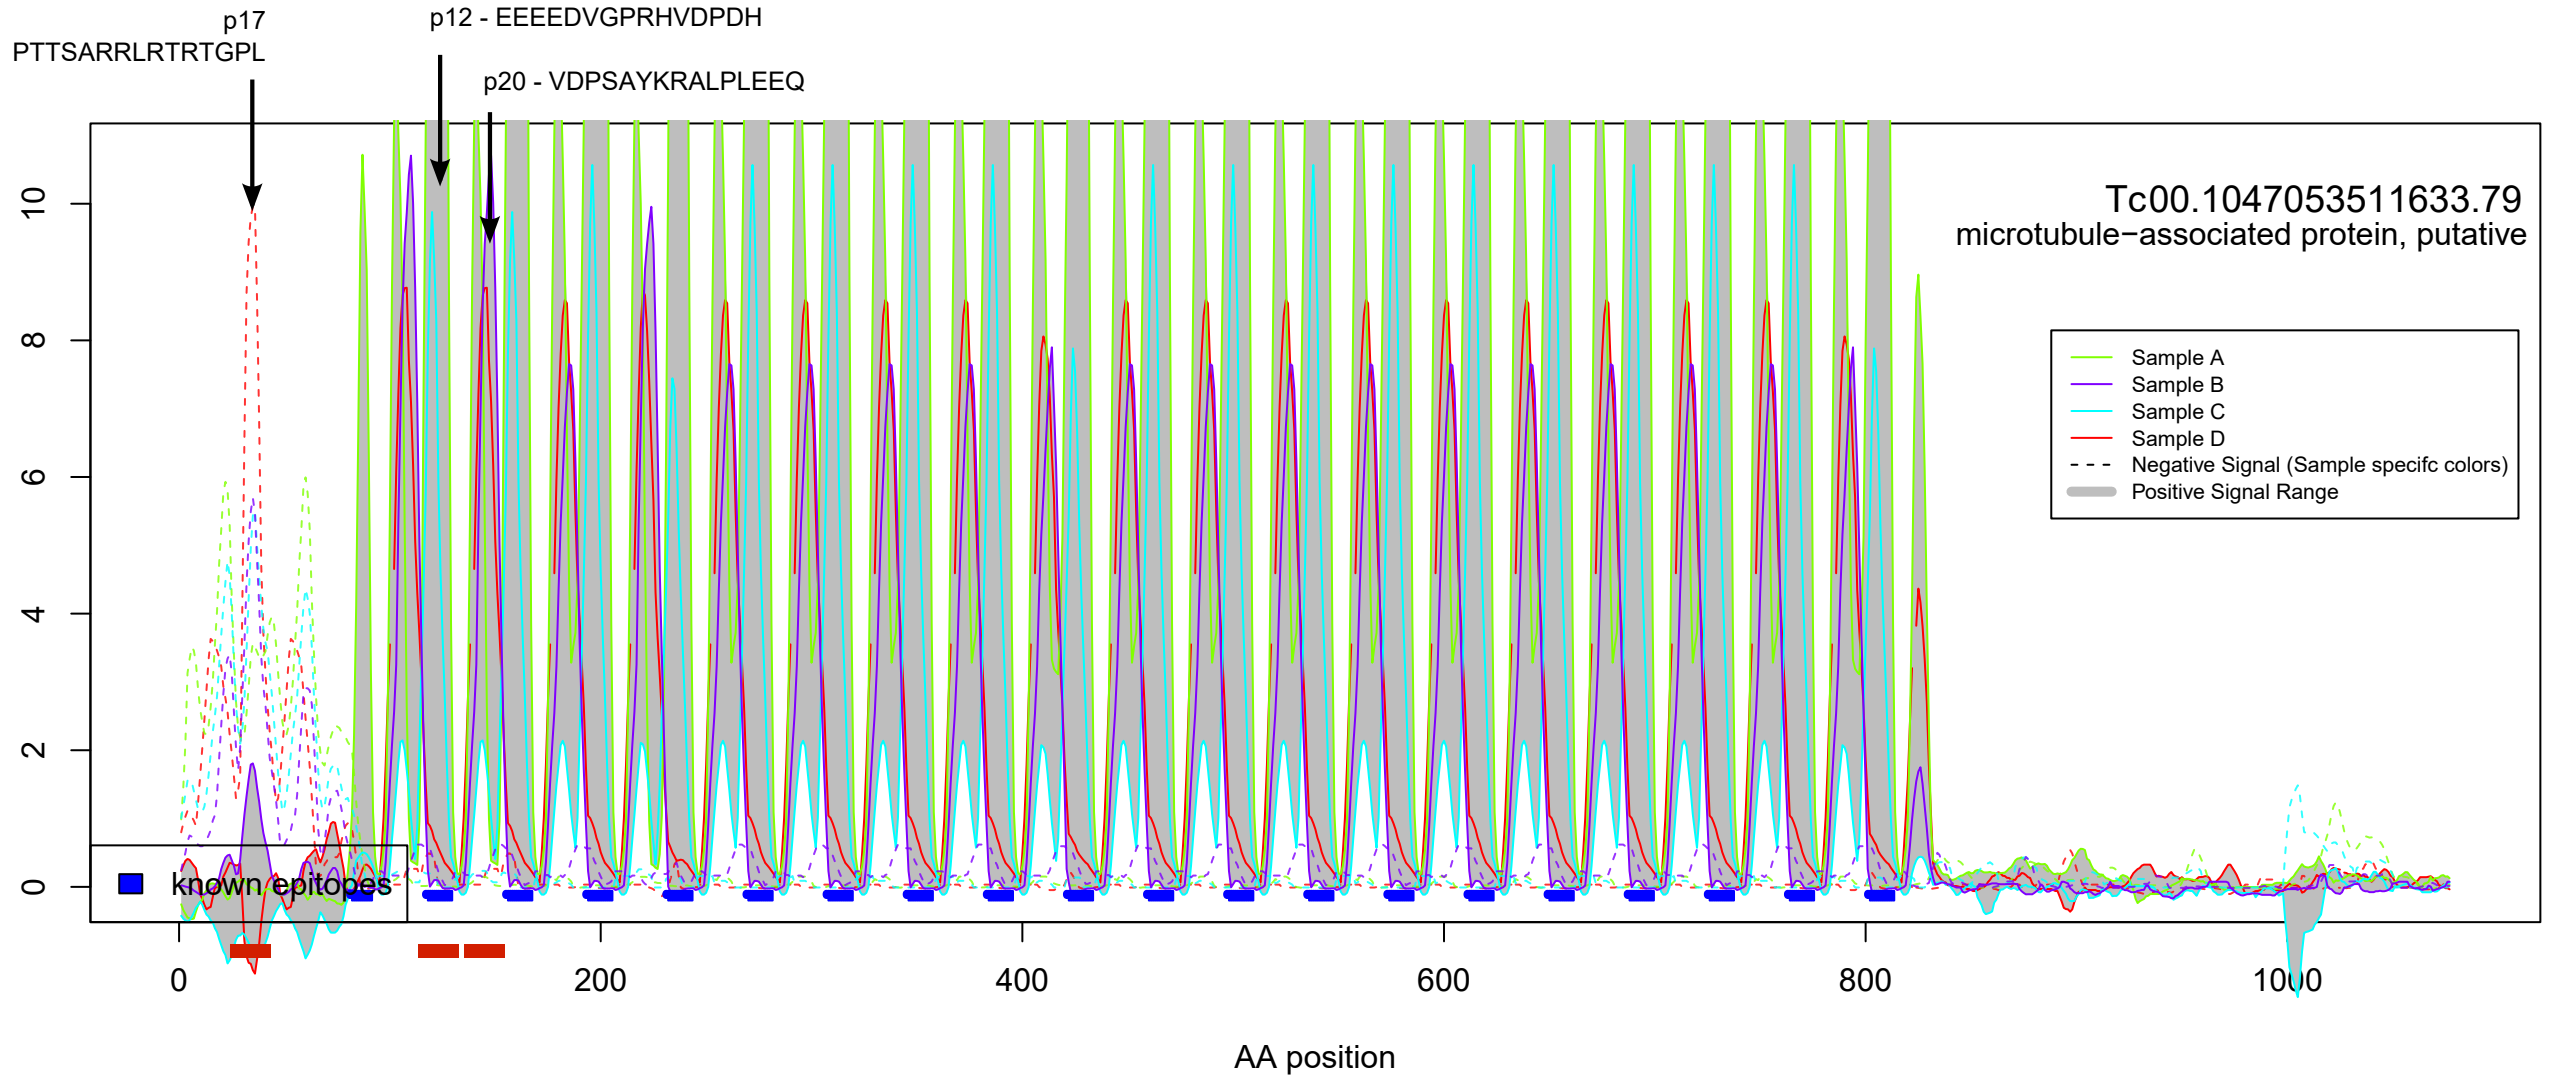

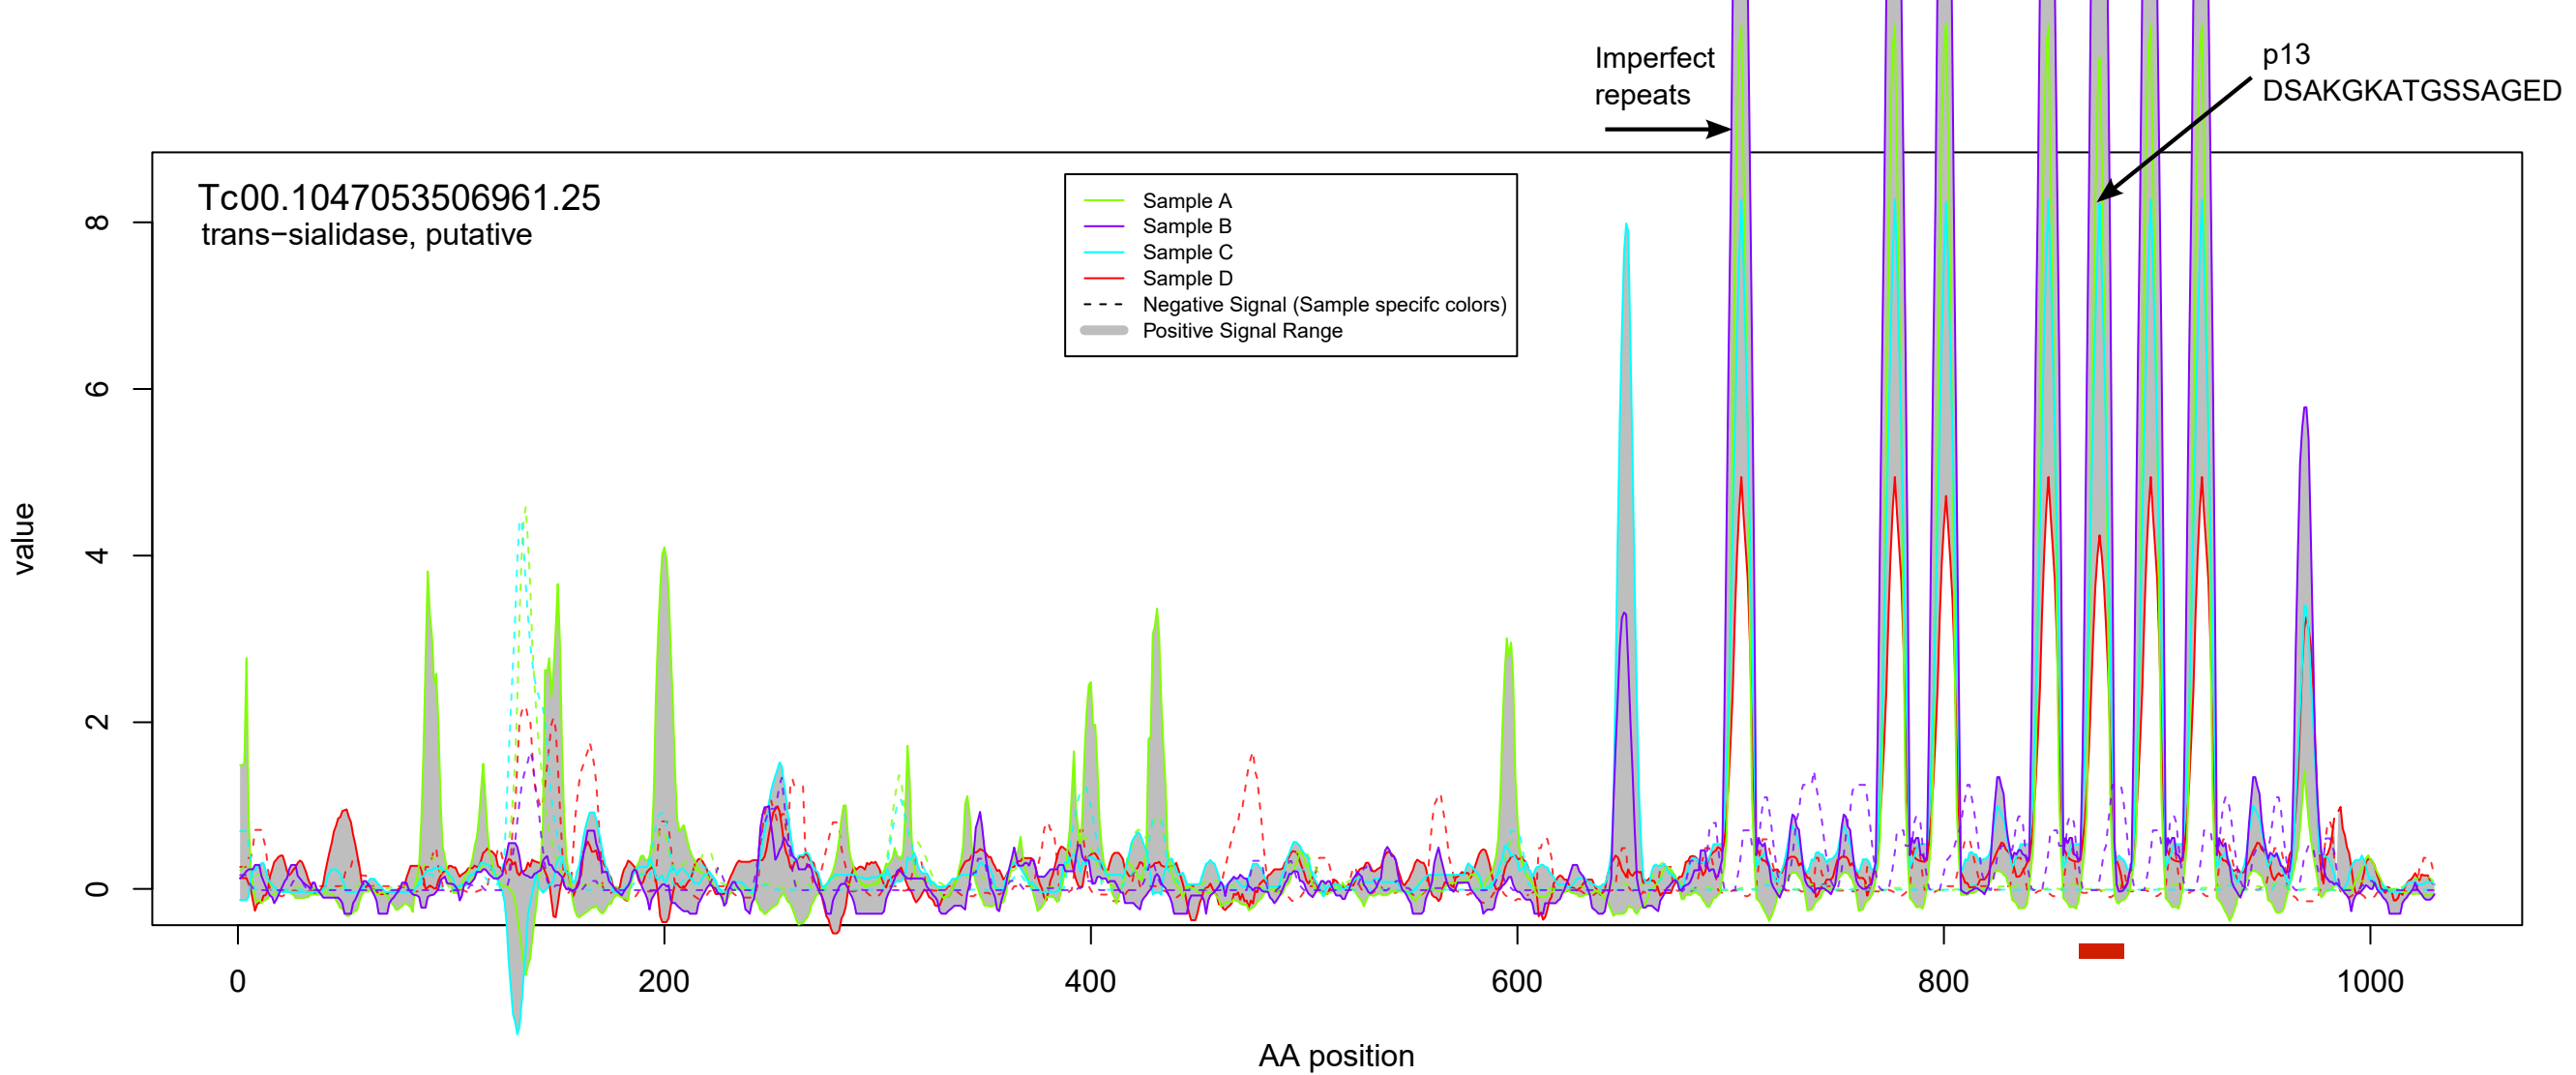

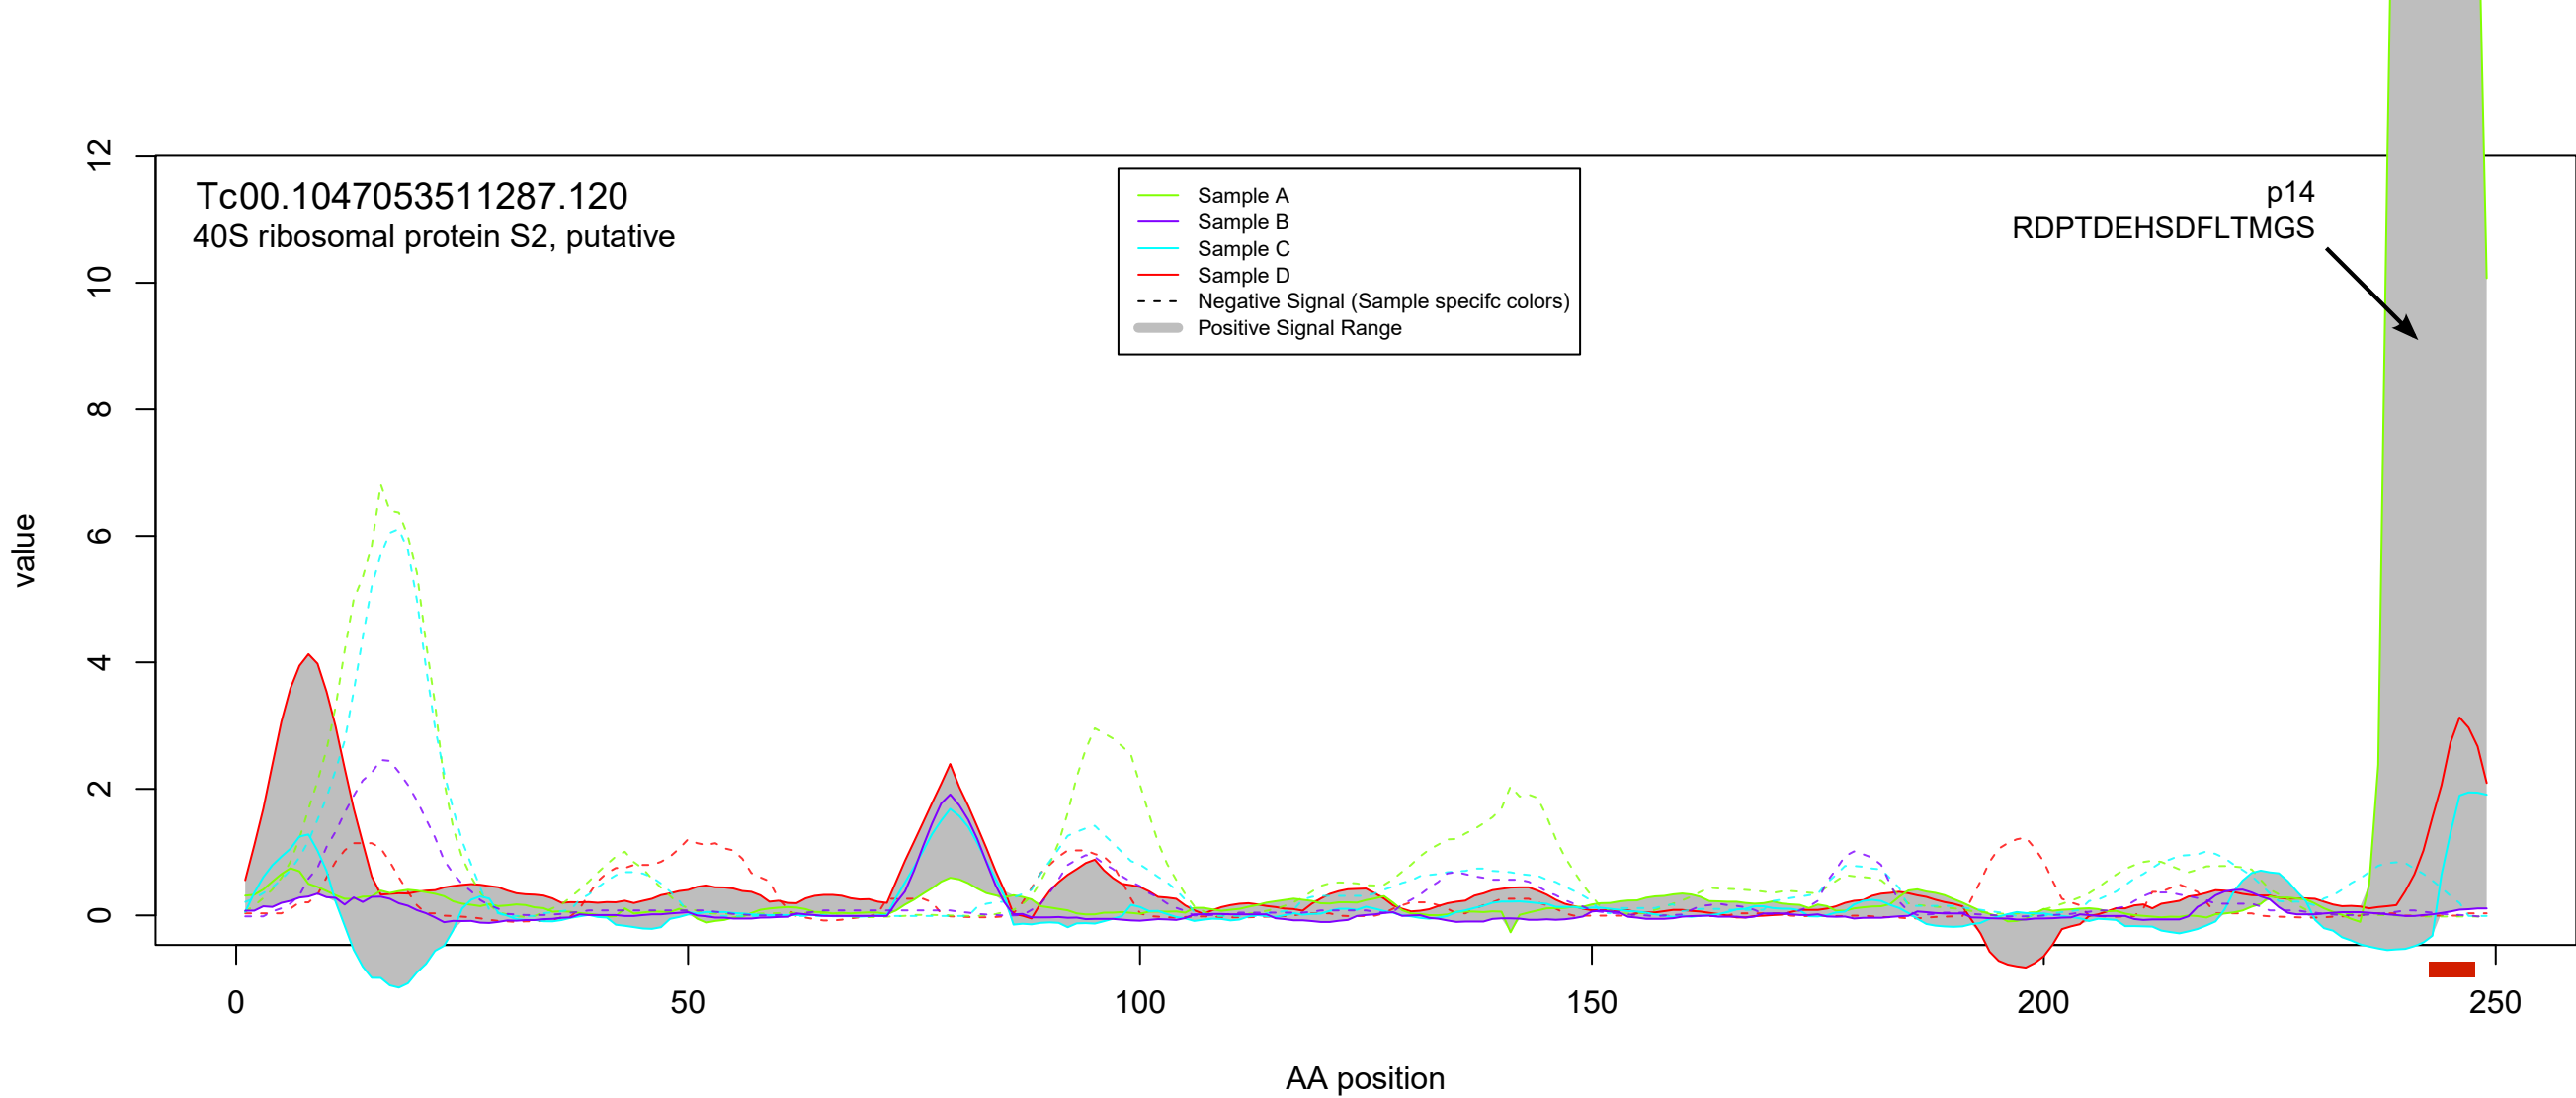

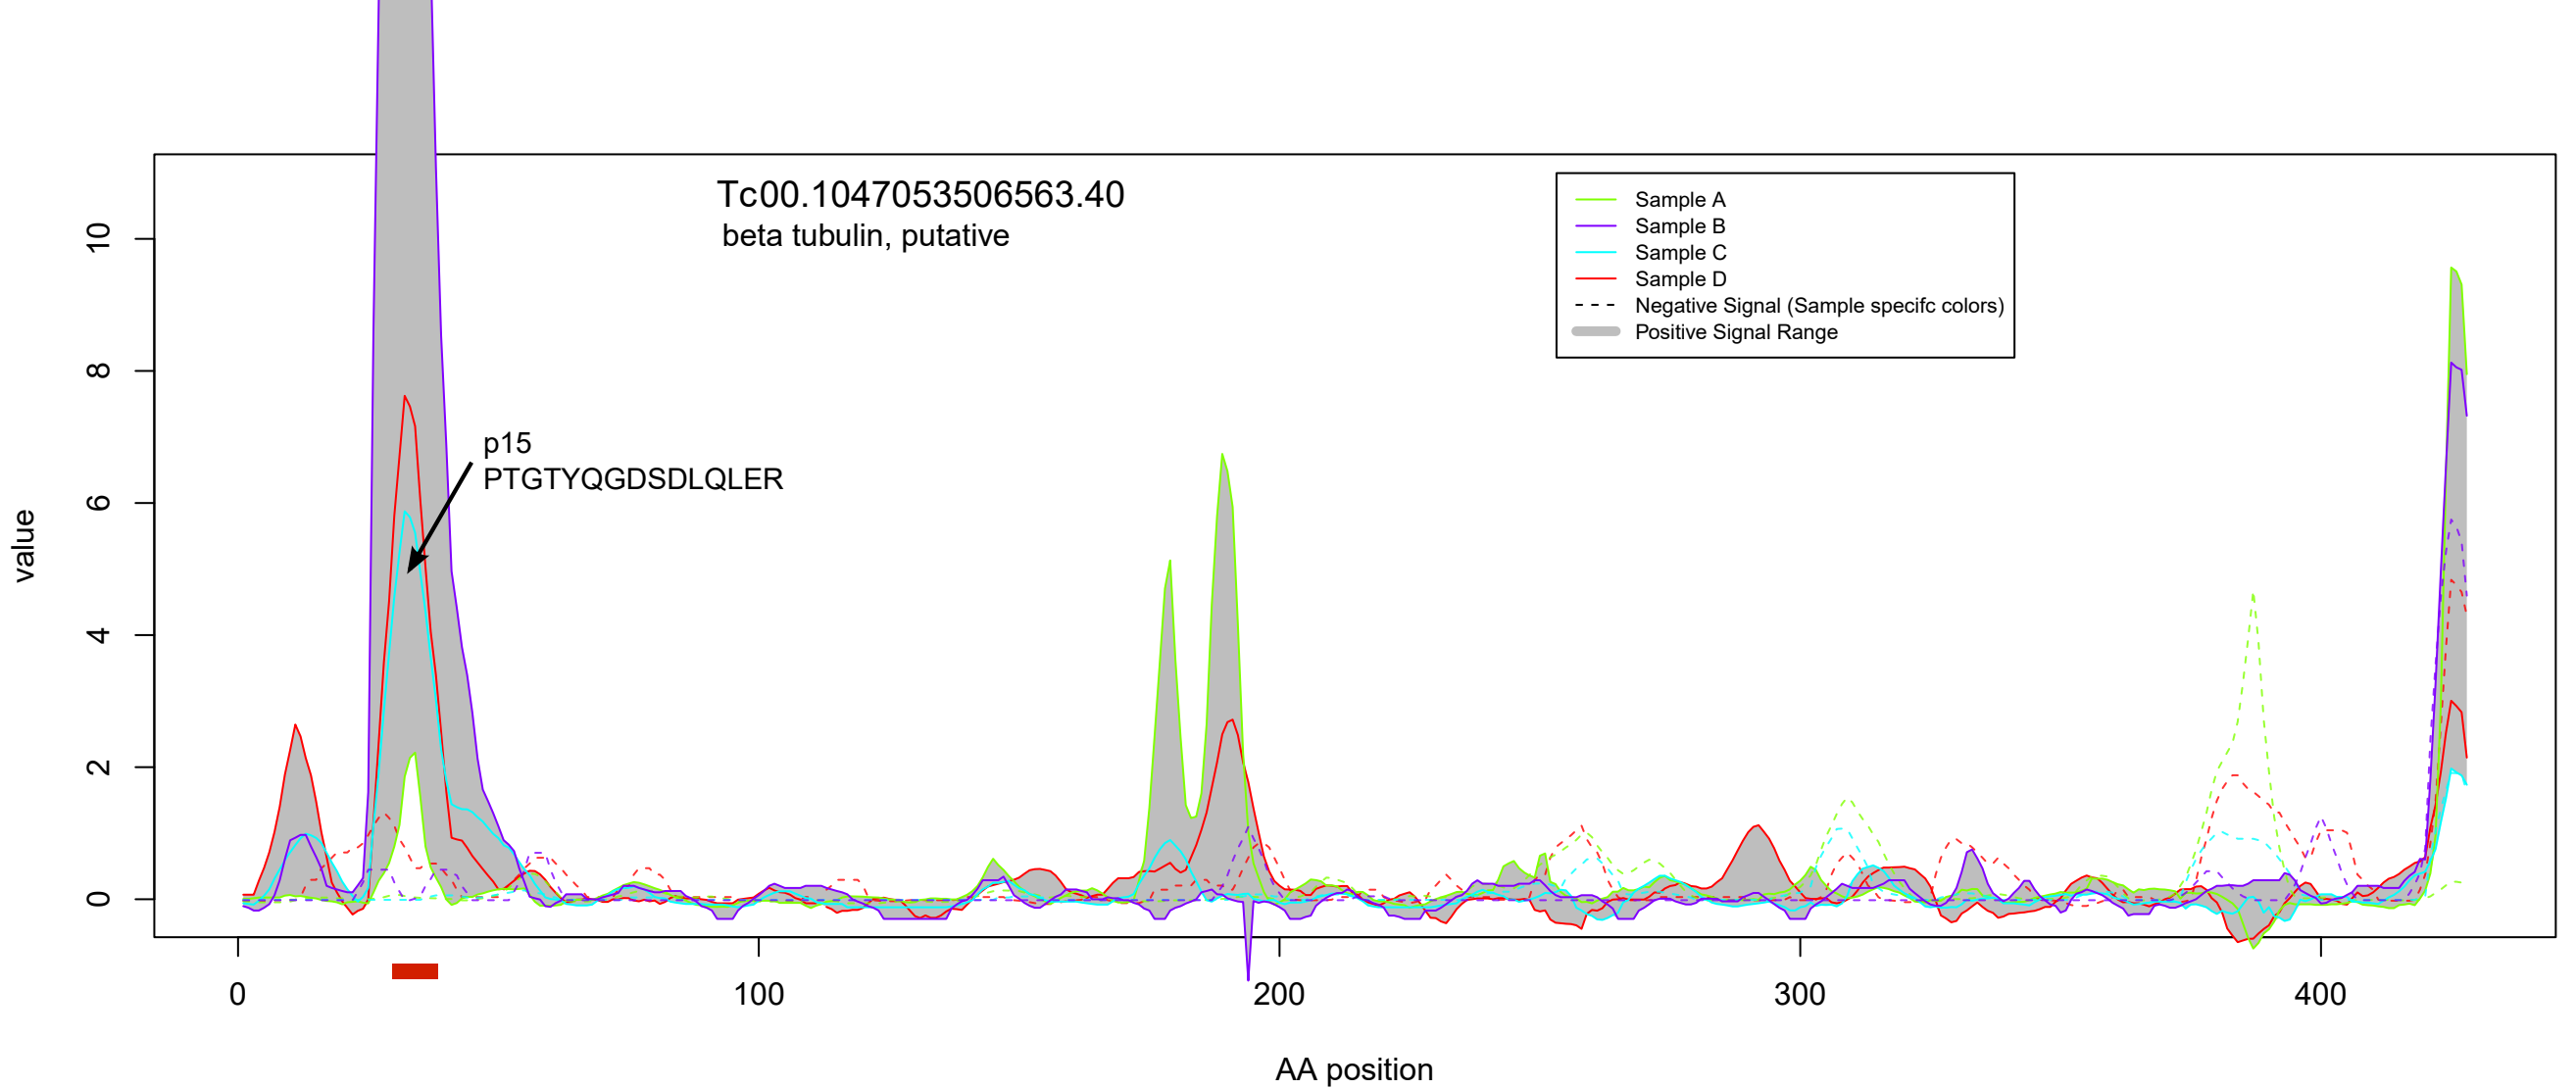

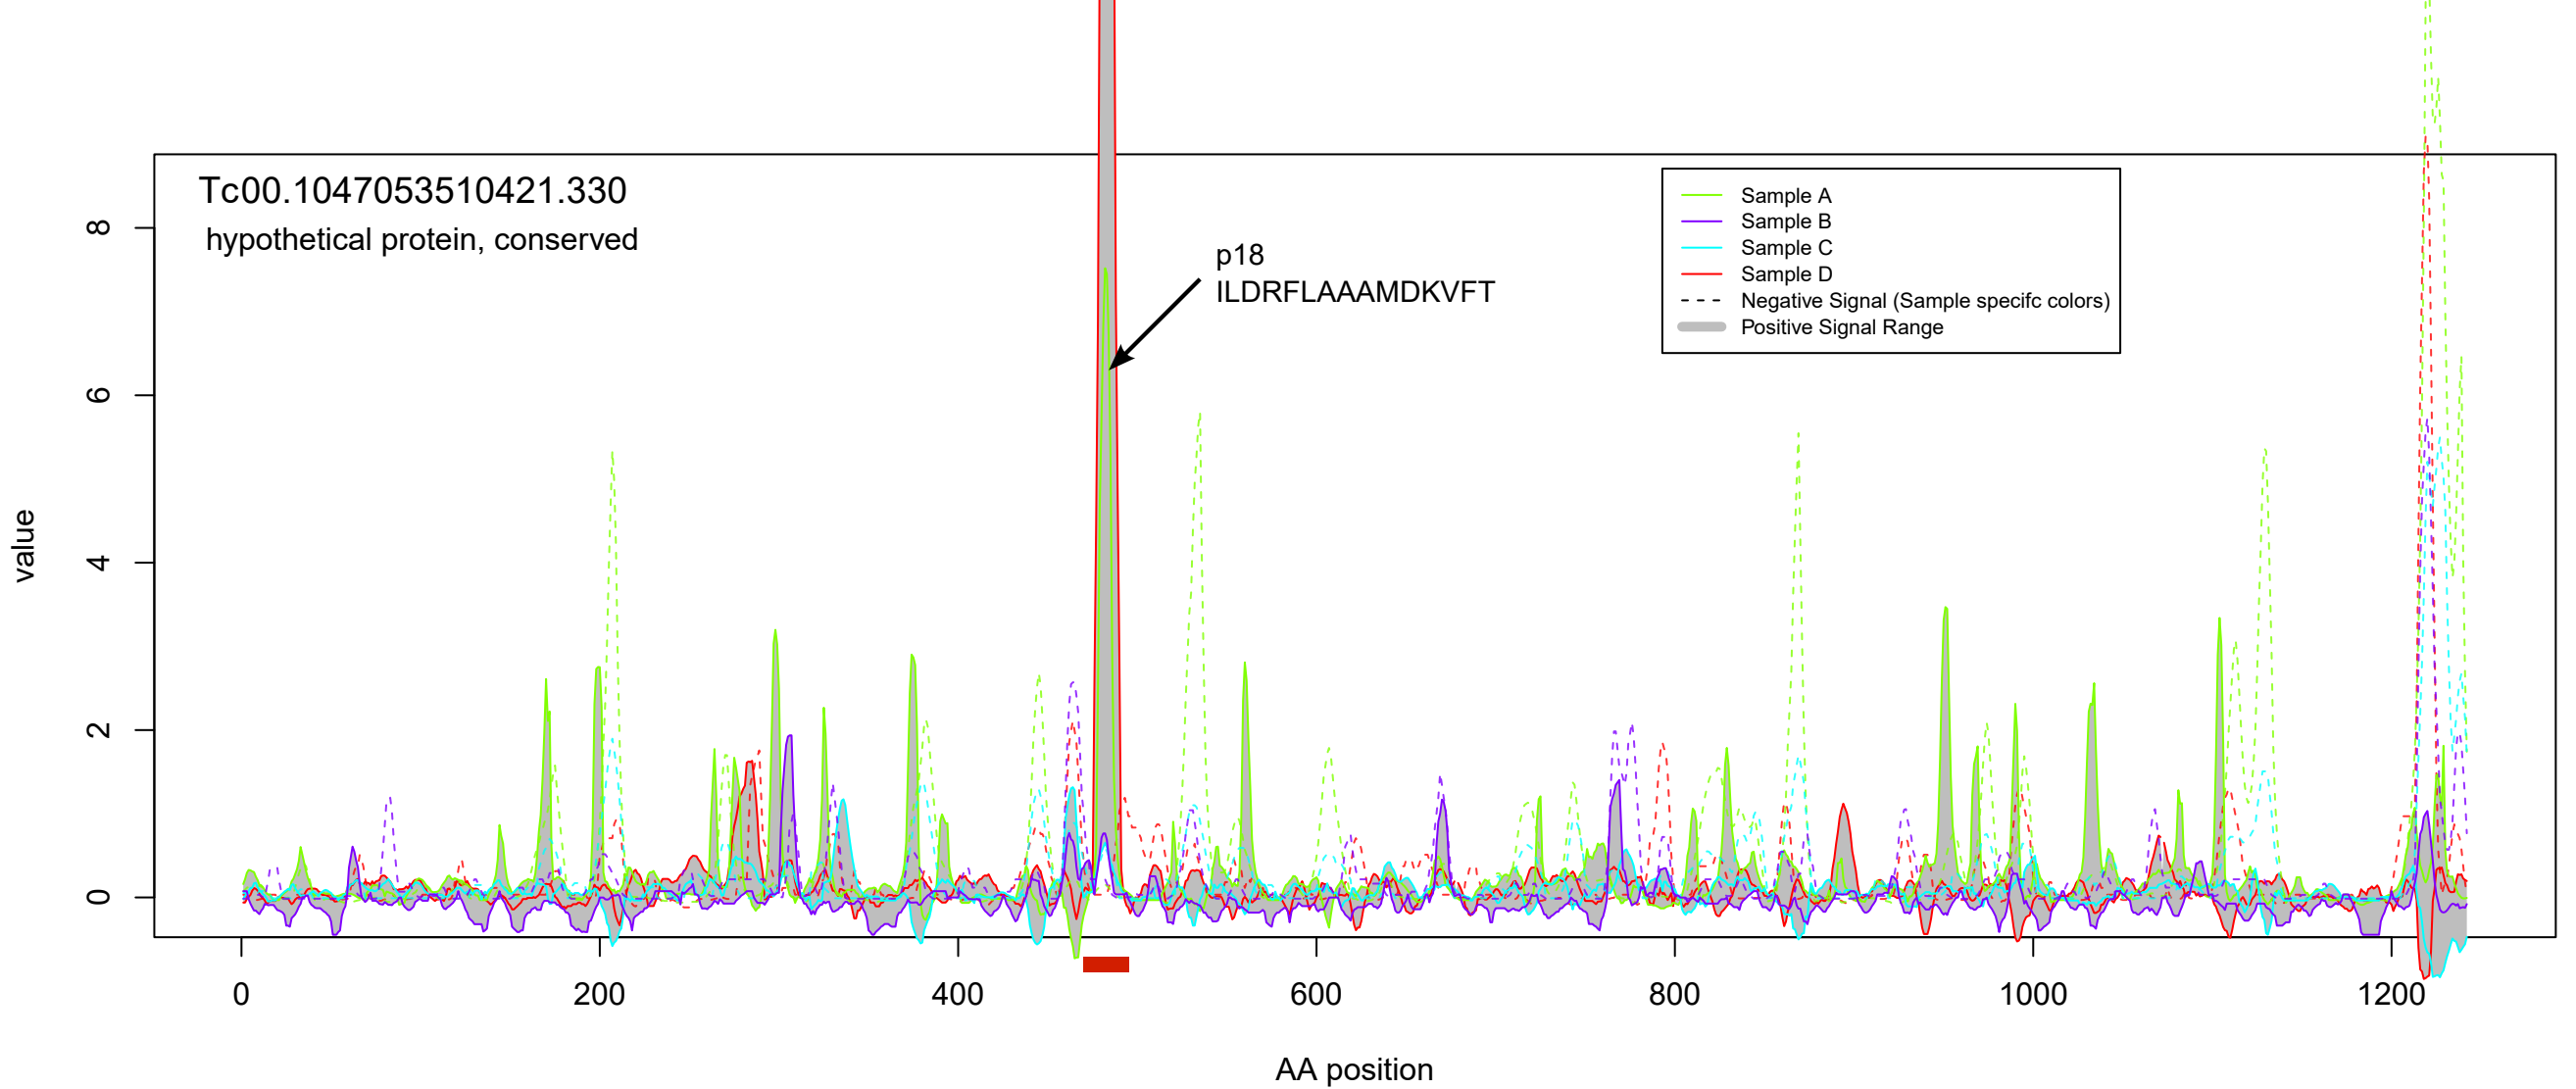



Tc00.1047053506989.190  
lipophosphoglycan biosynthetic protein, putative,  
heat shock protein 90, putative;  
glucose regulated protein 94, putative

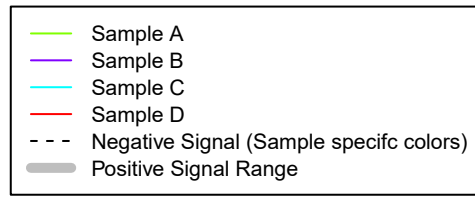

PVDNDGDESSDKEDA  
p19

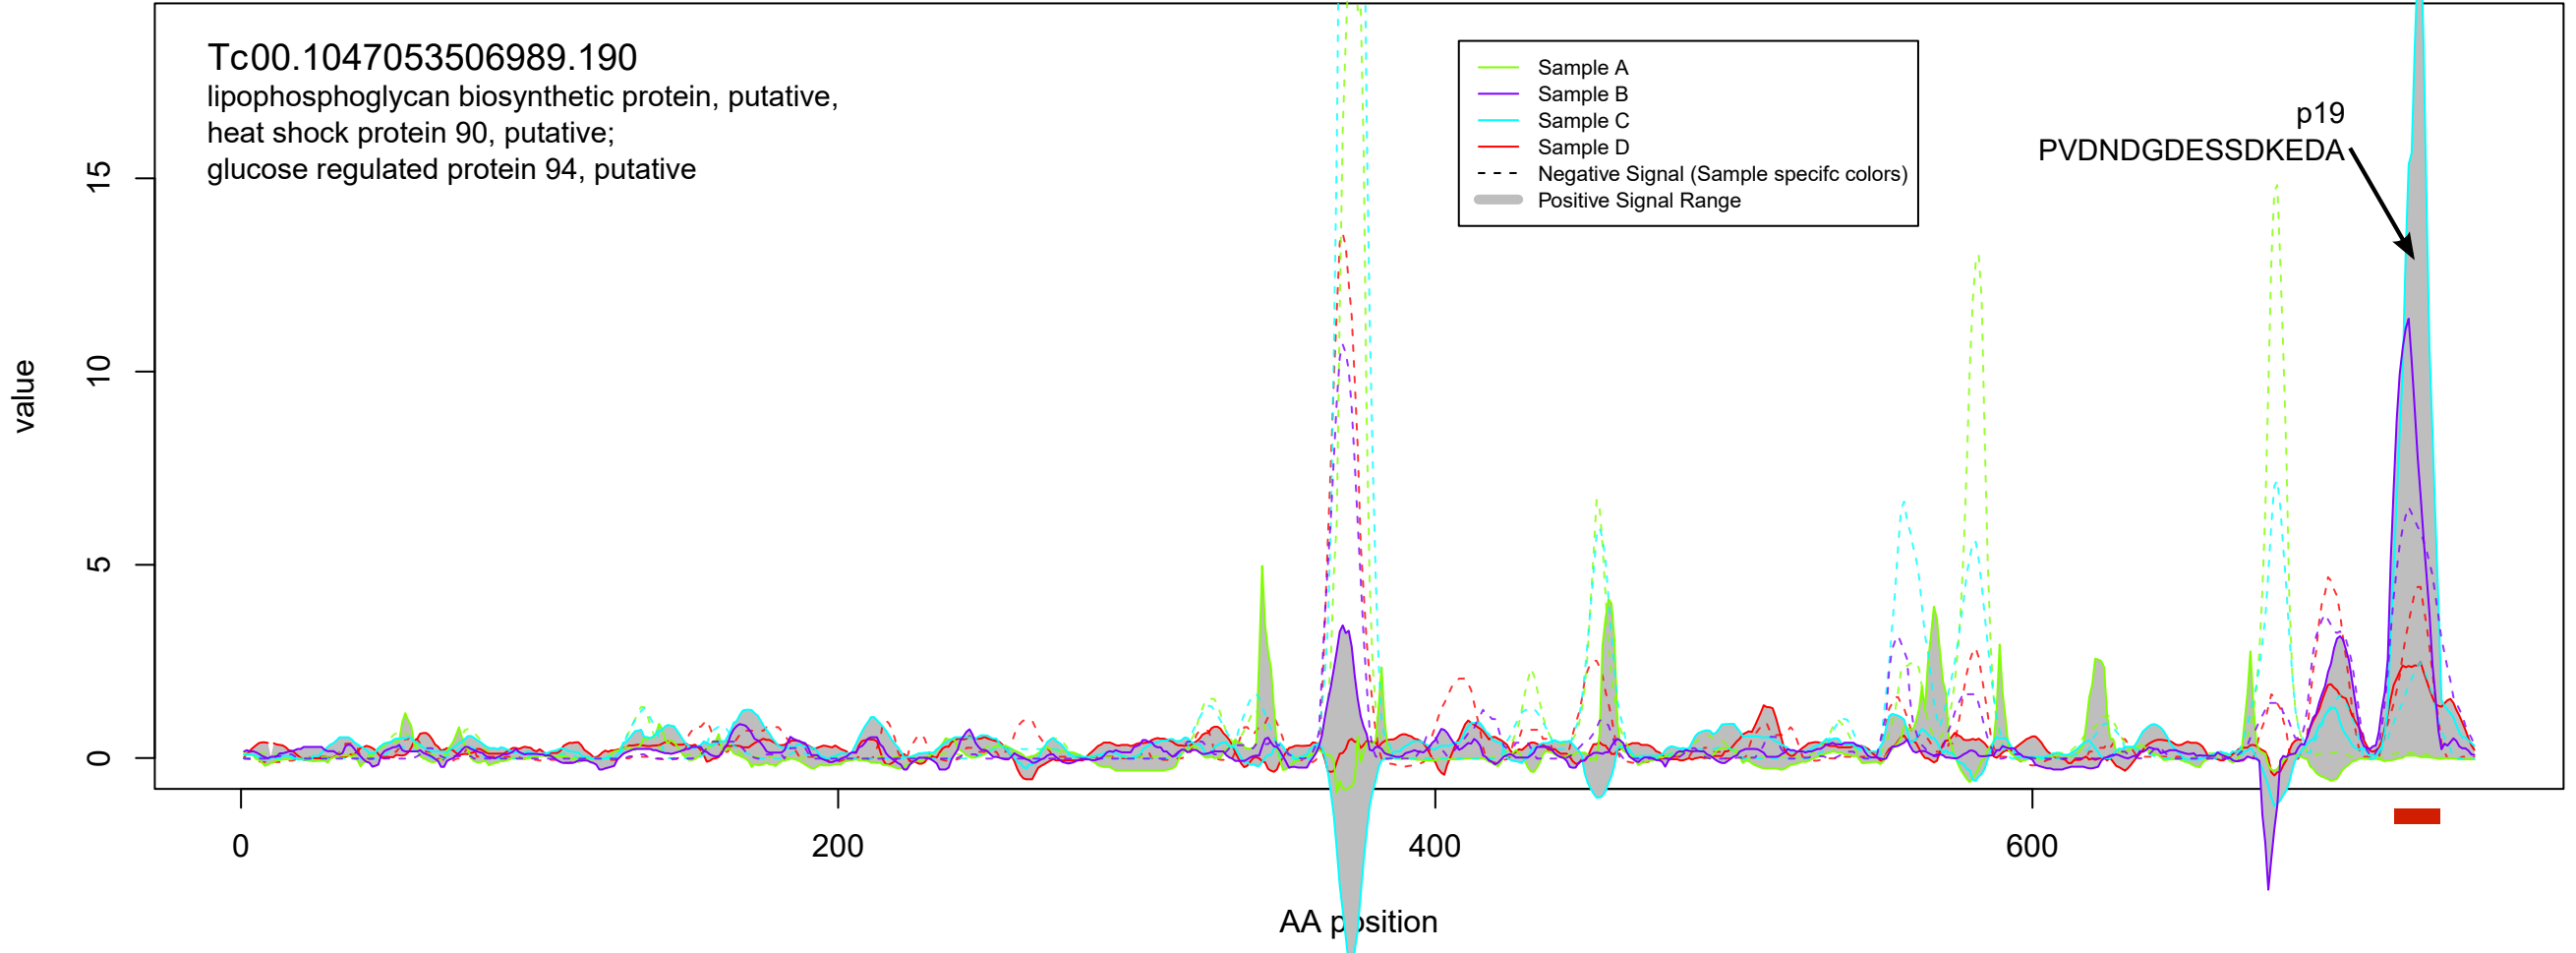

**Best 15mer**  
SGAVPEGEEYPTAE

p21

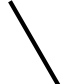

Tc00.1047053509157.120  
hypothetical protein, conserved

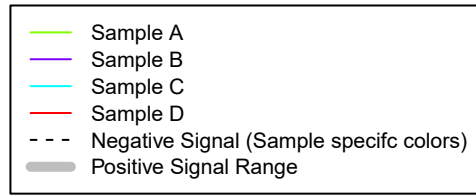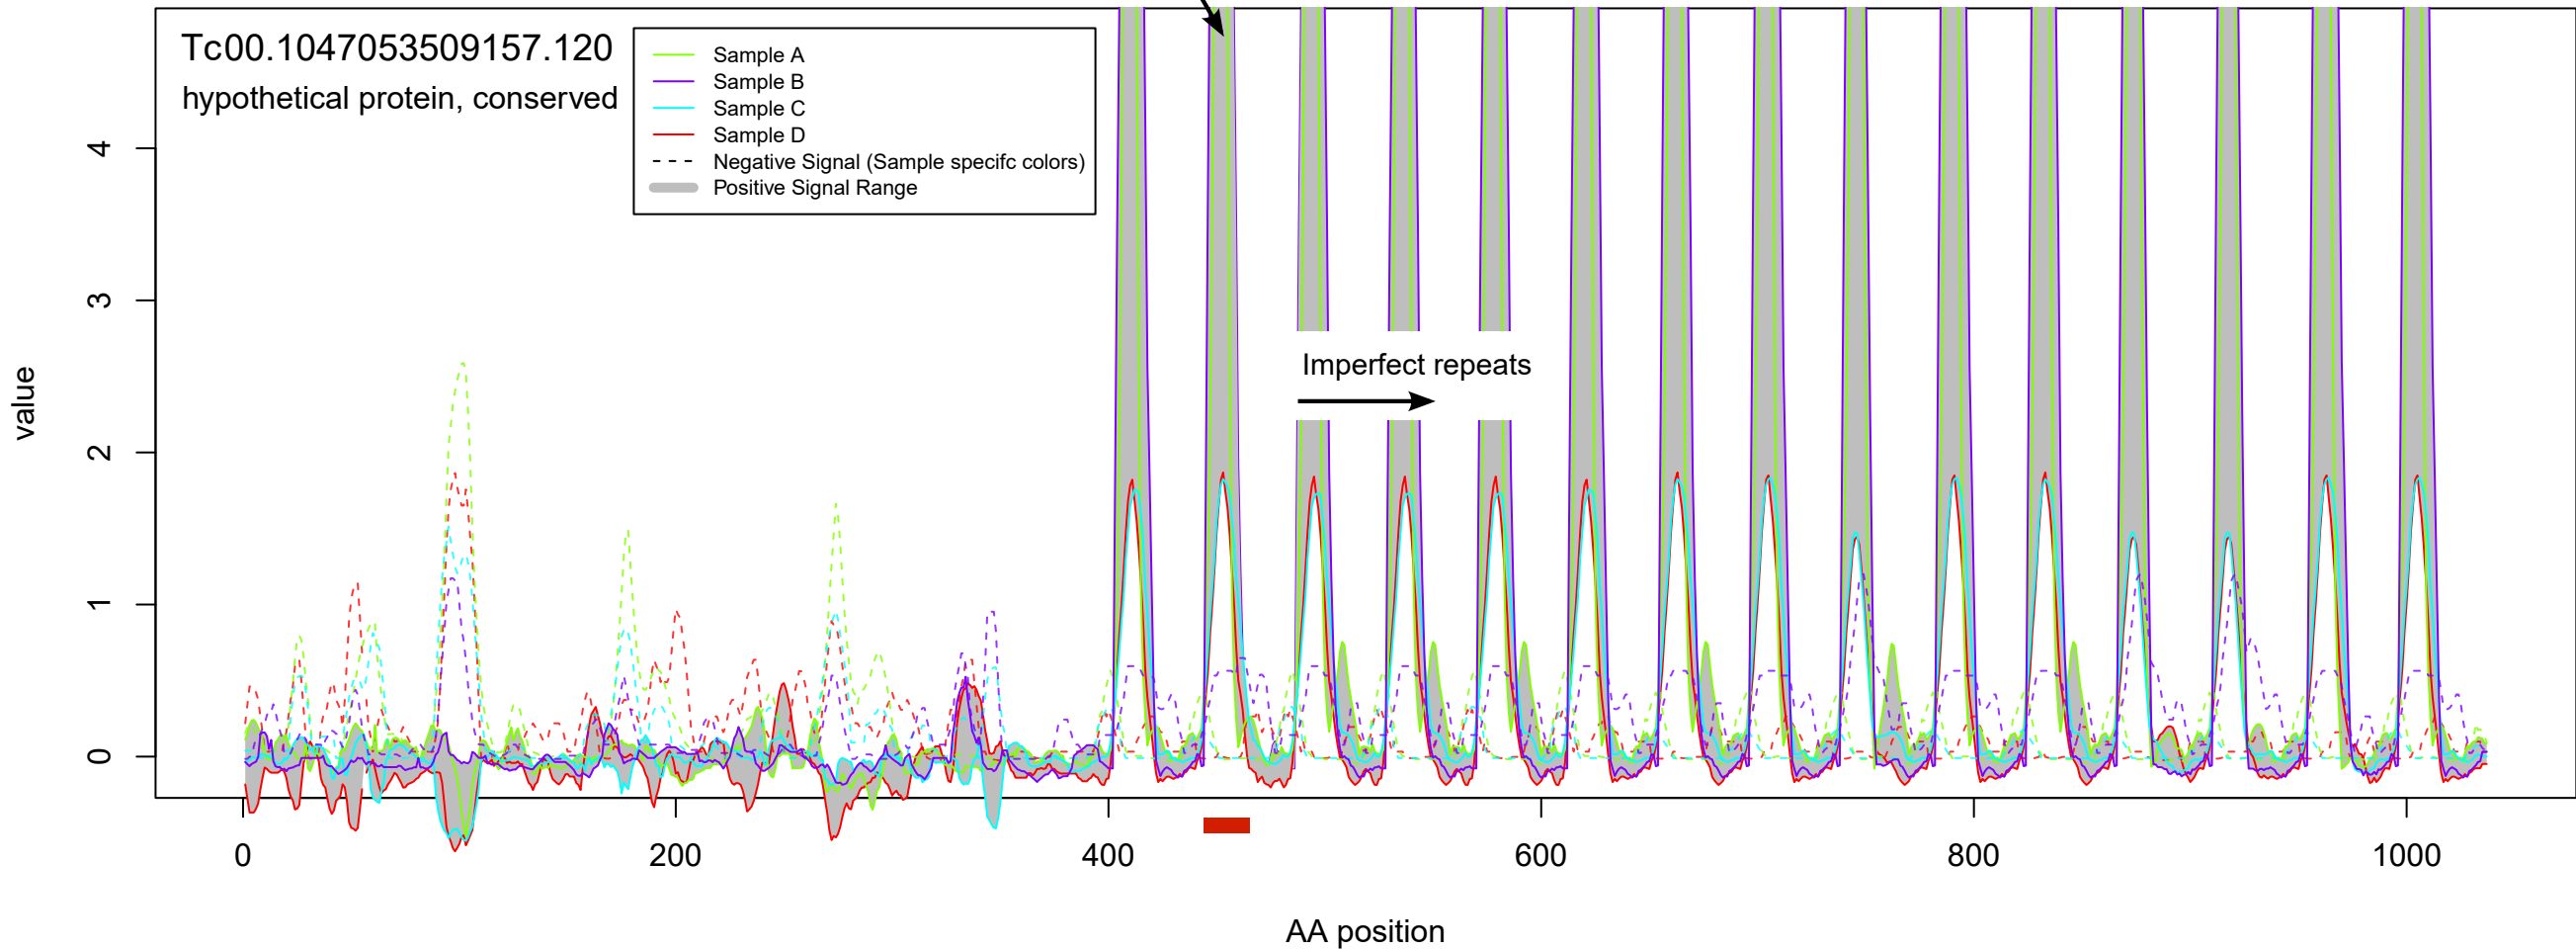

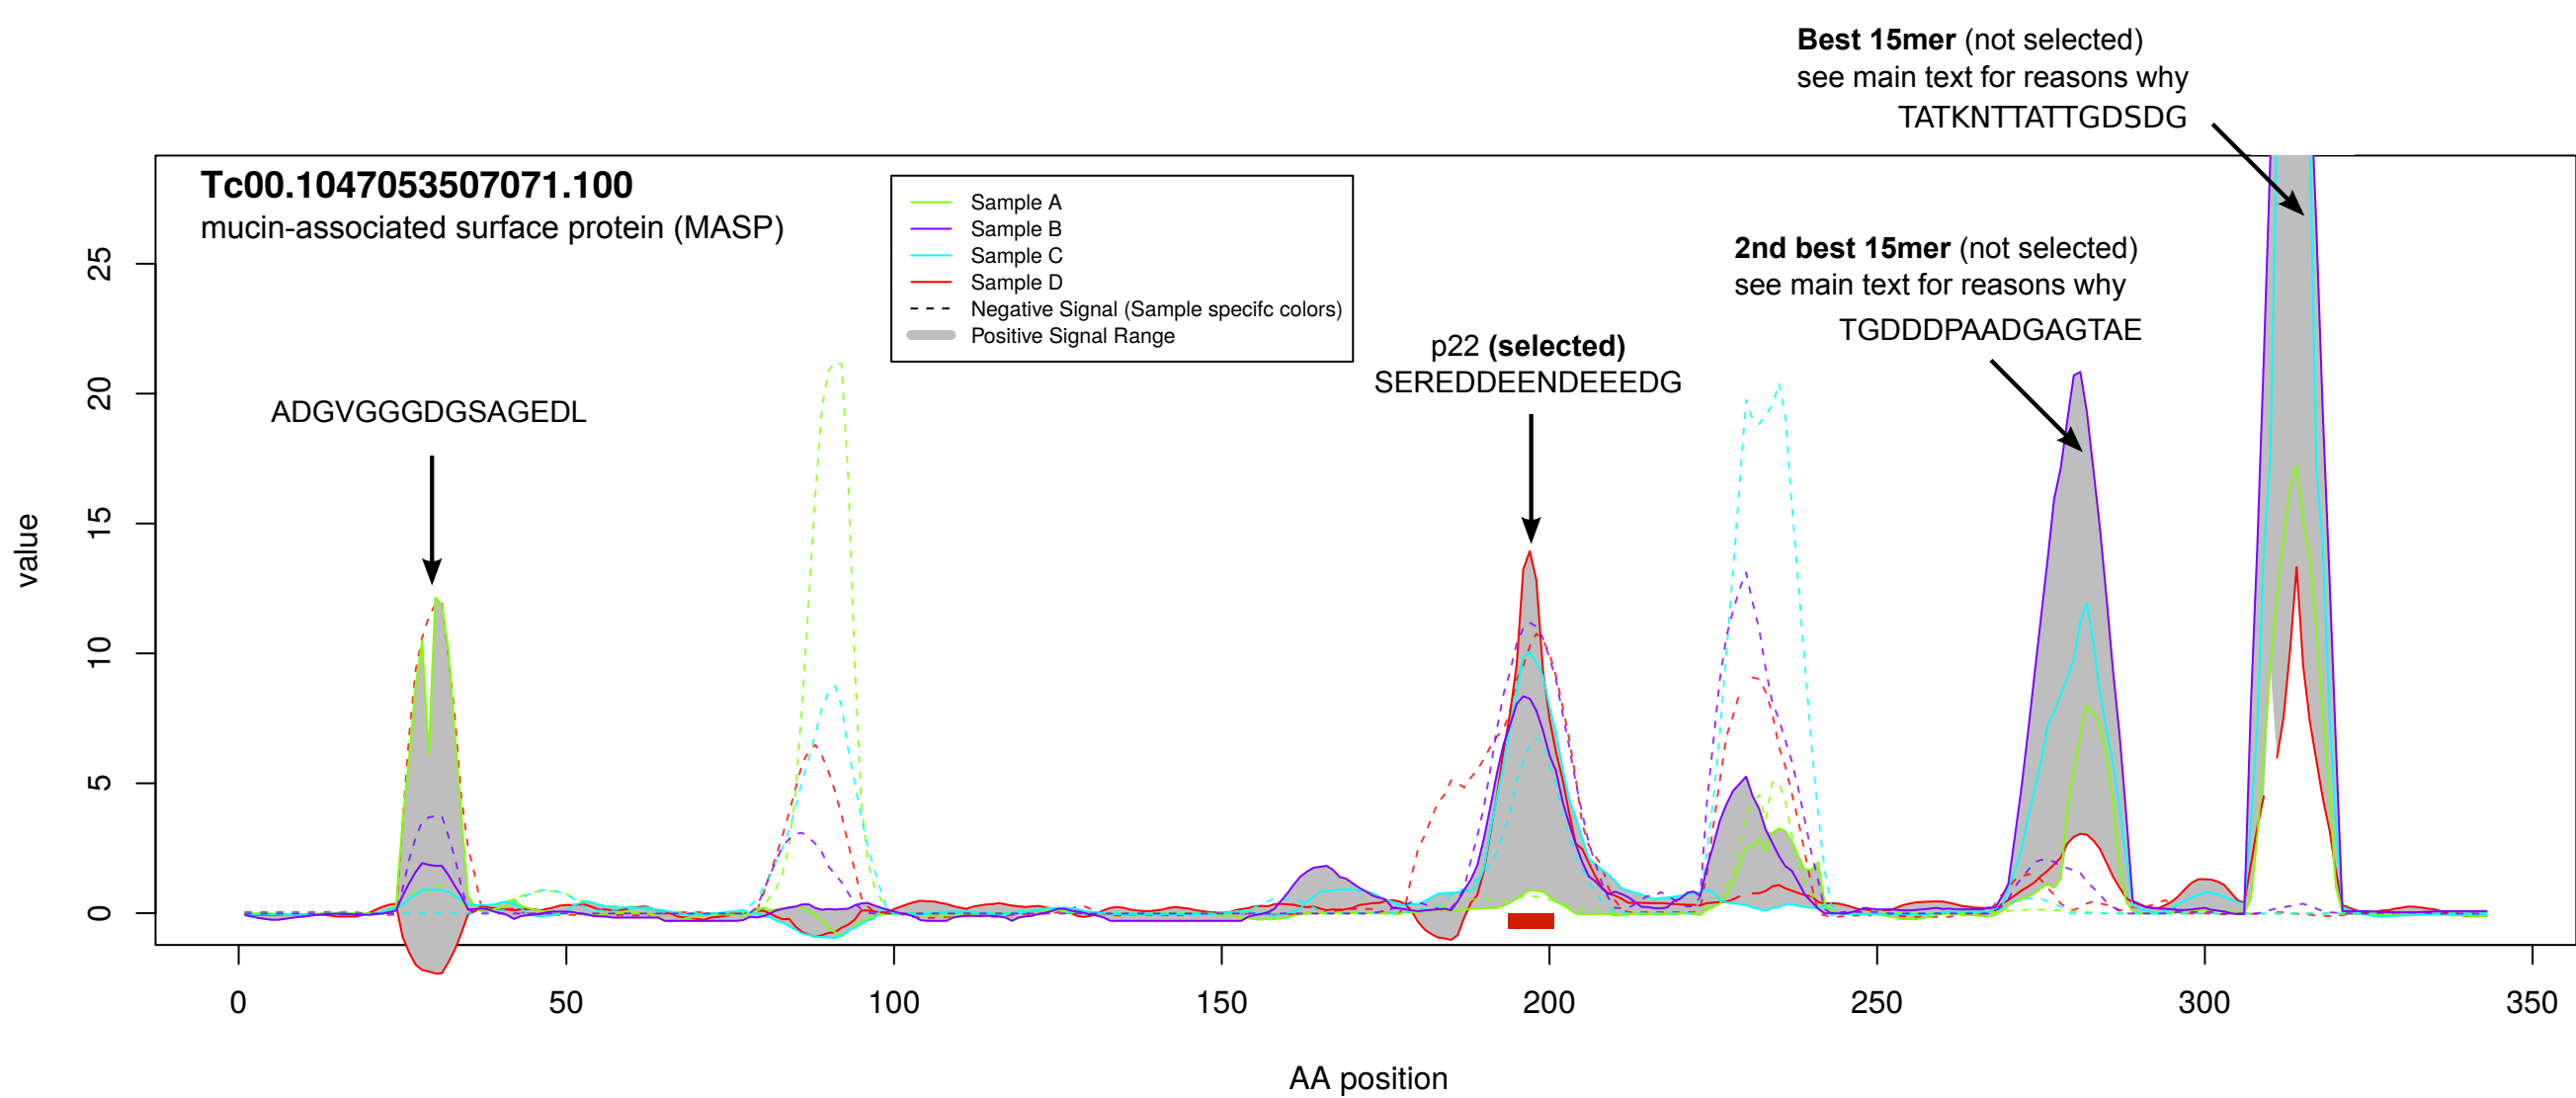

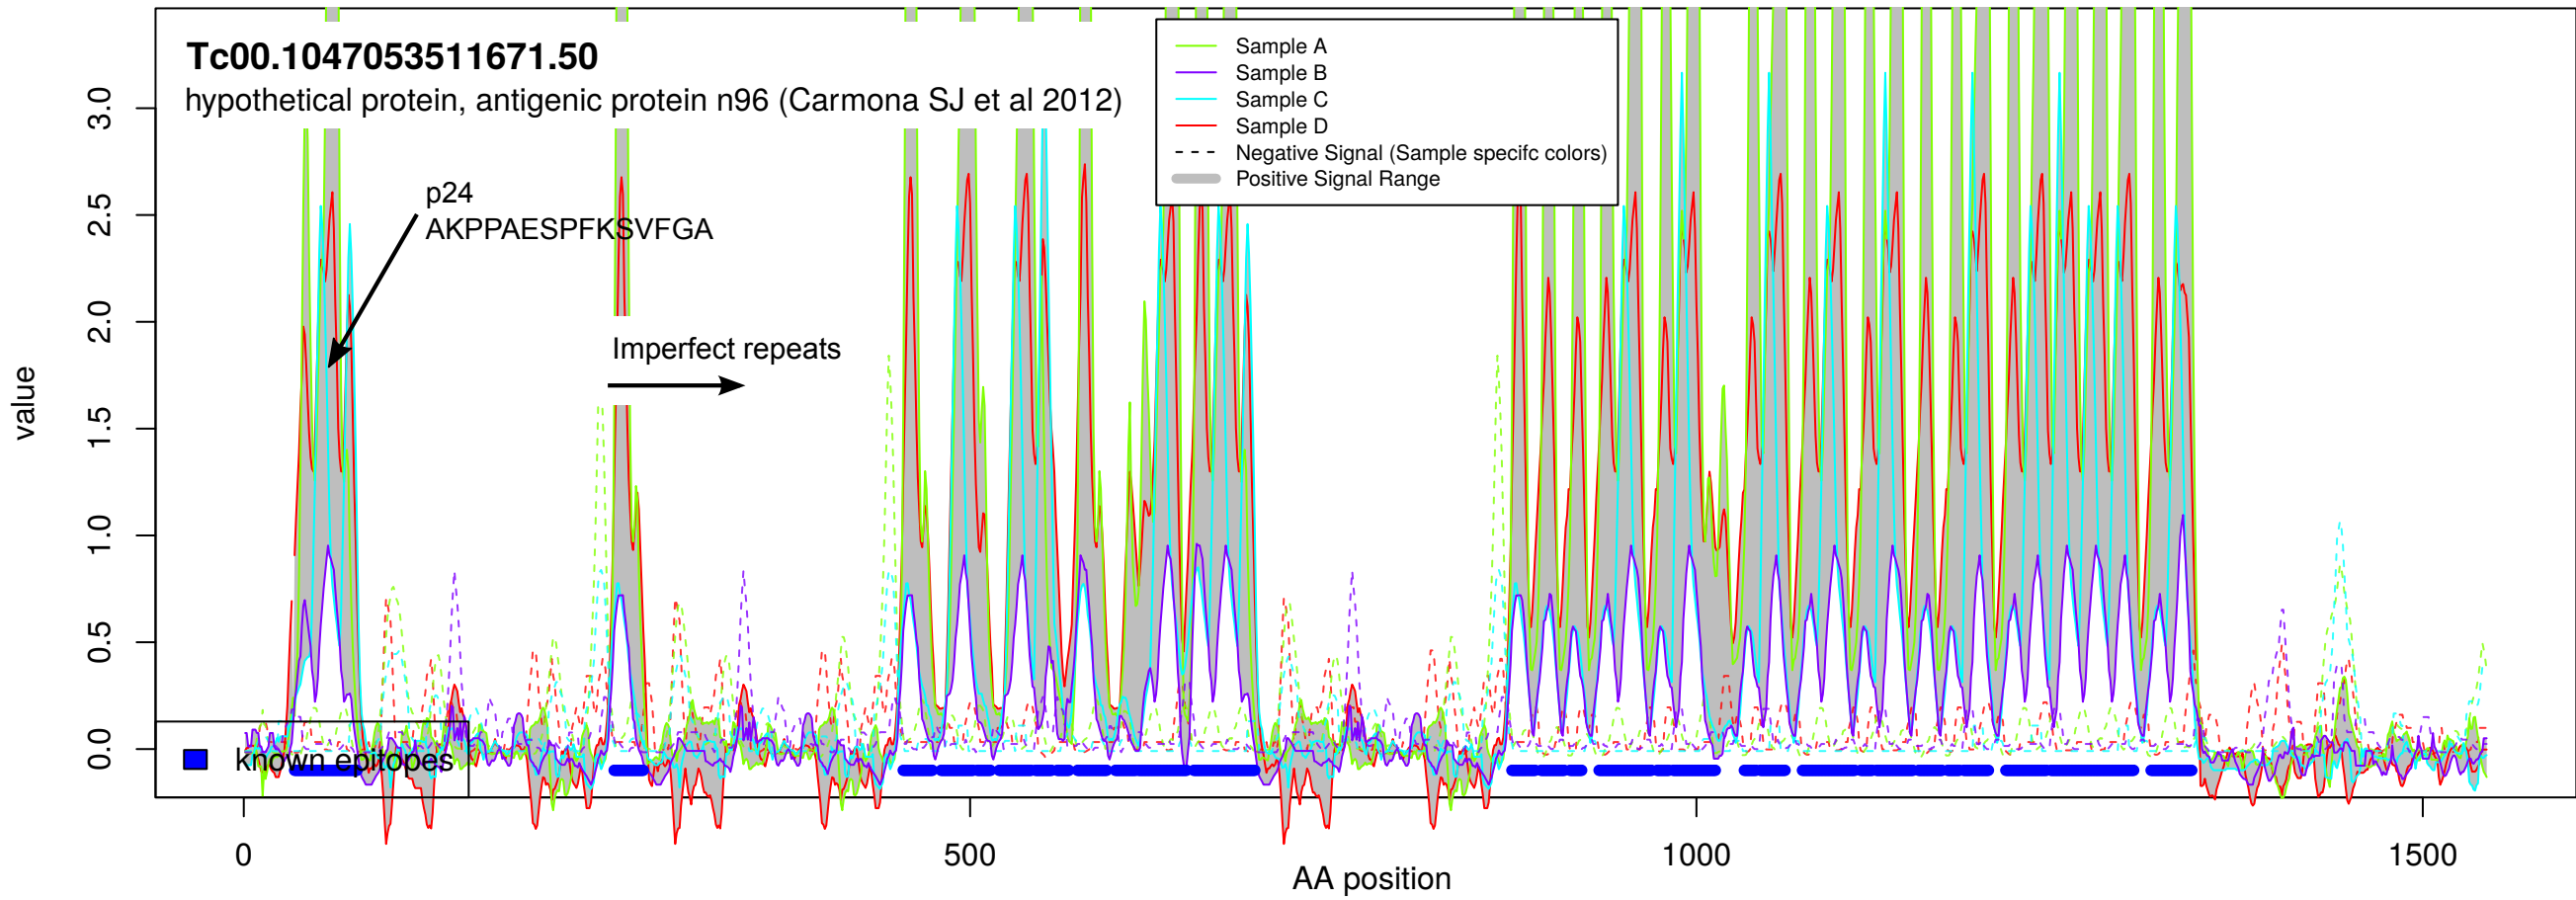

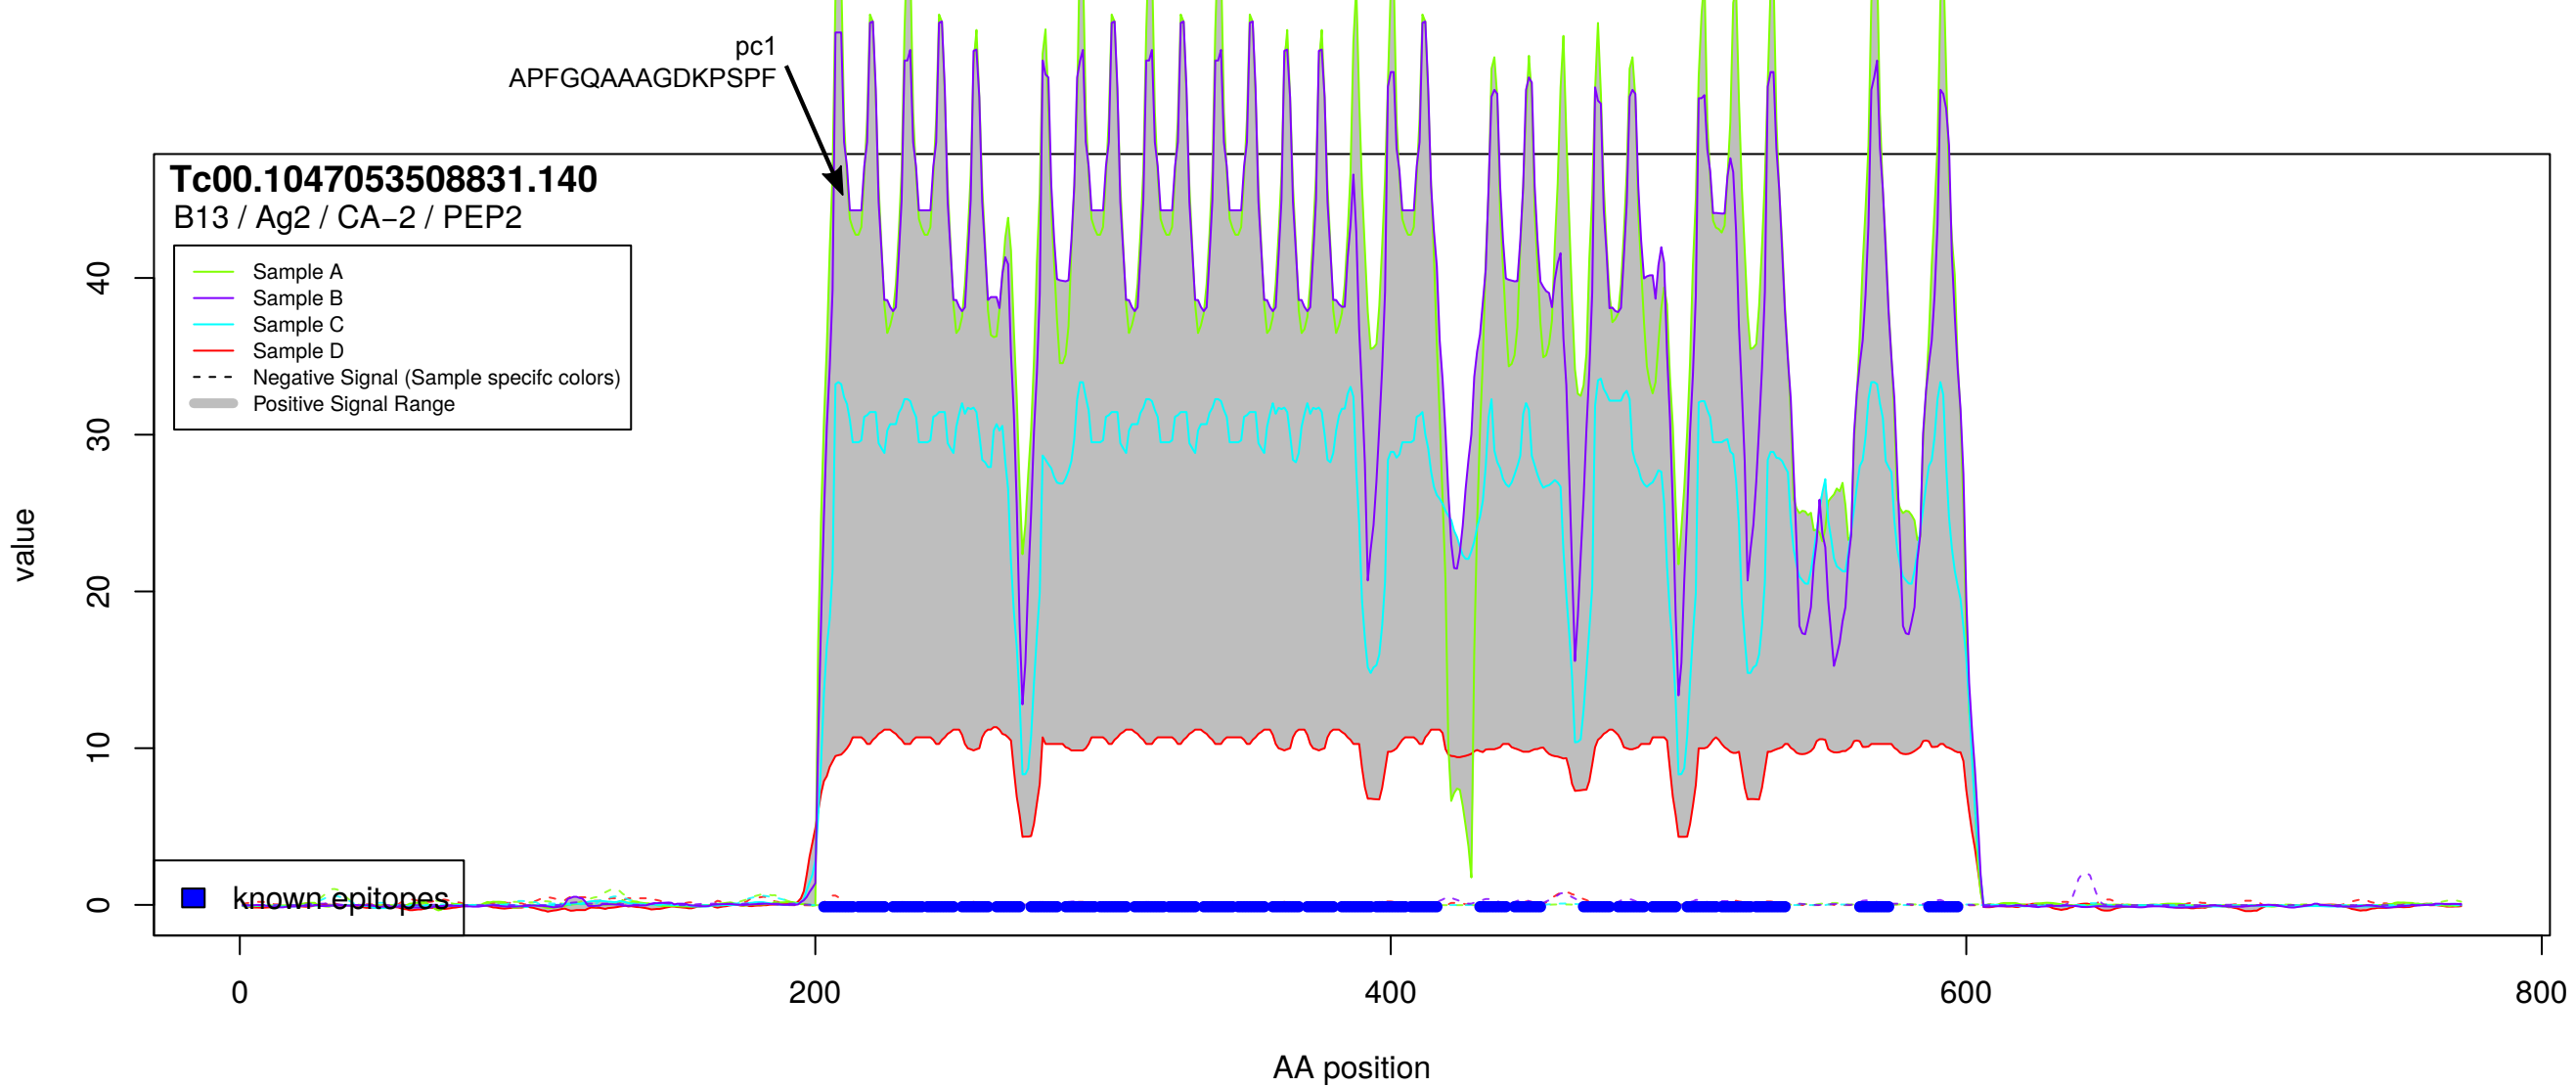



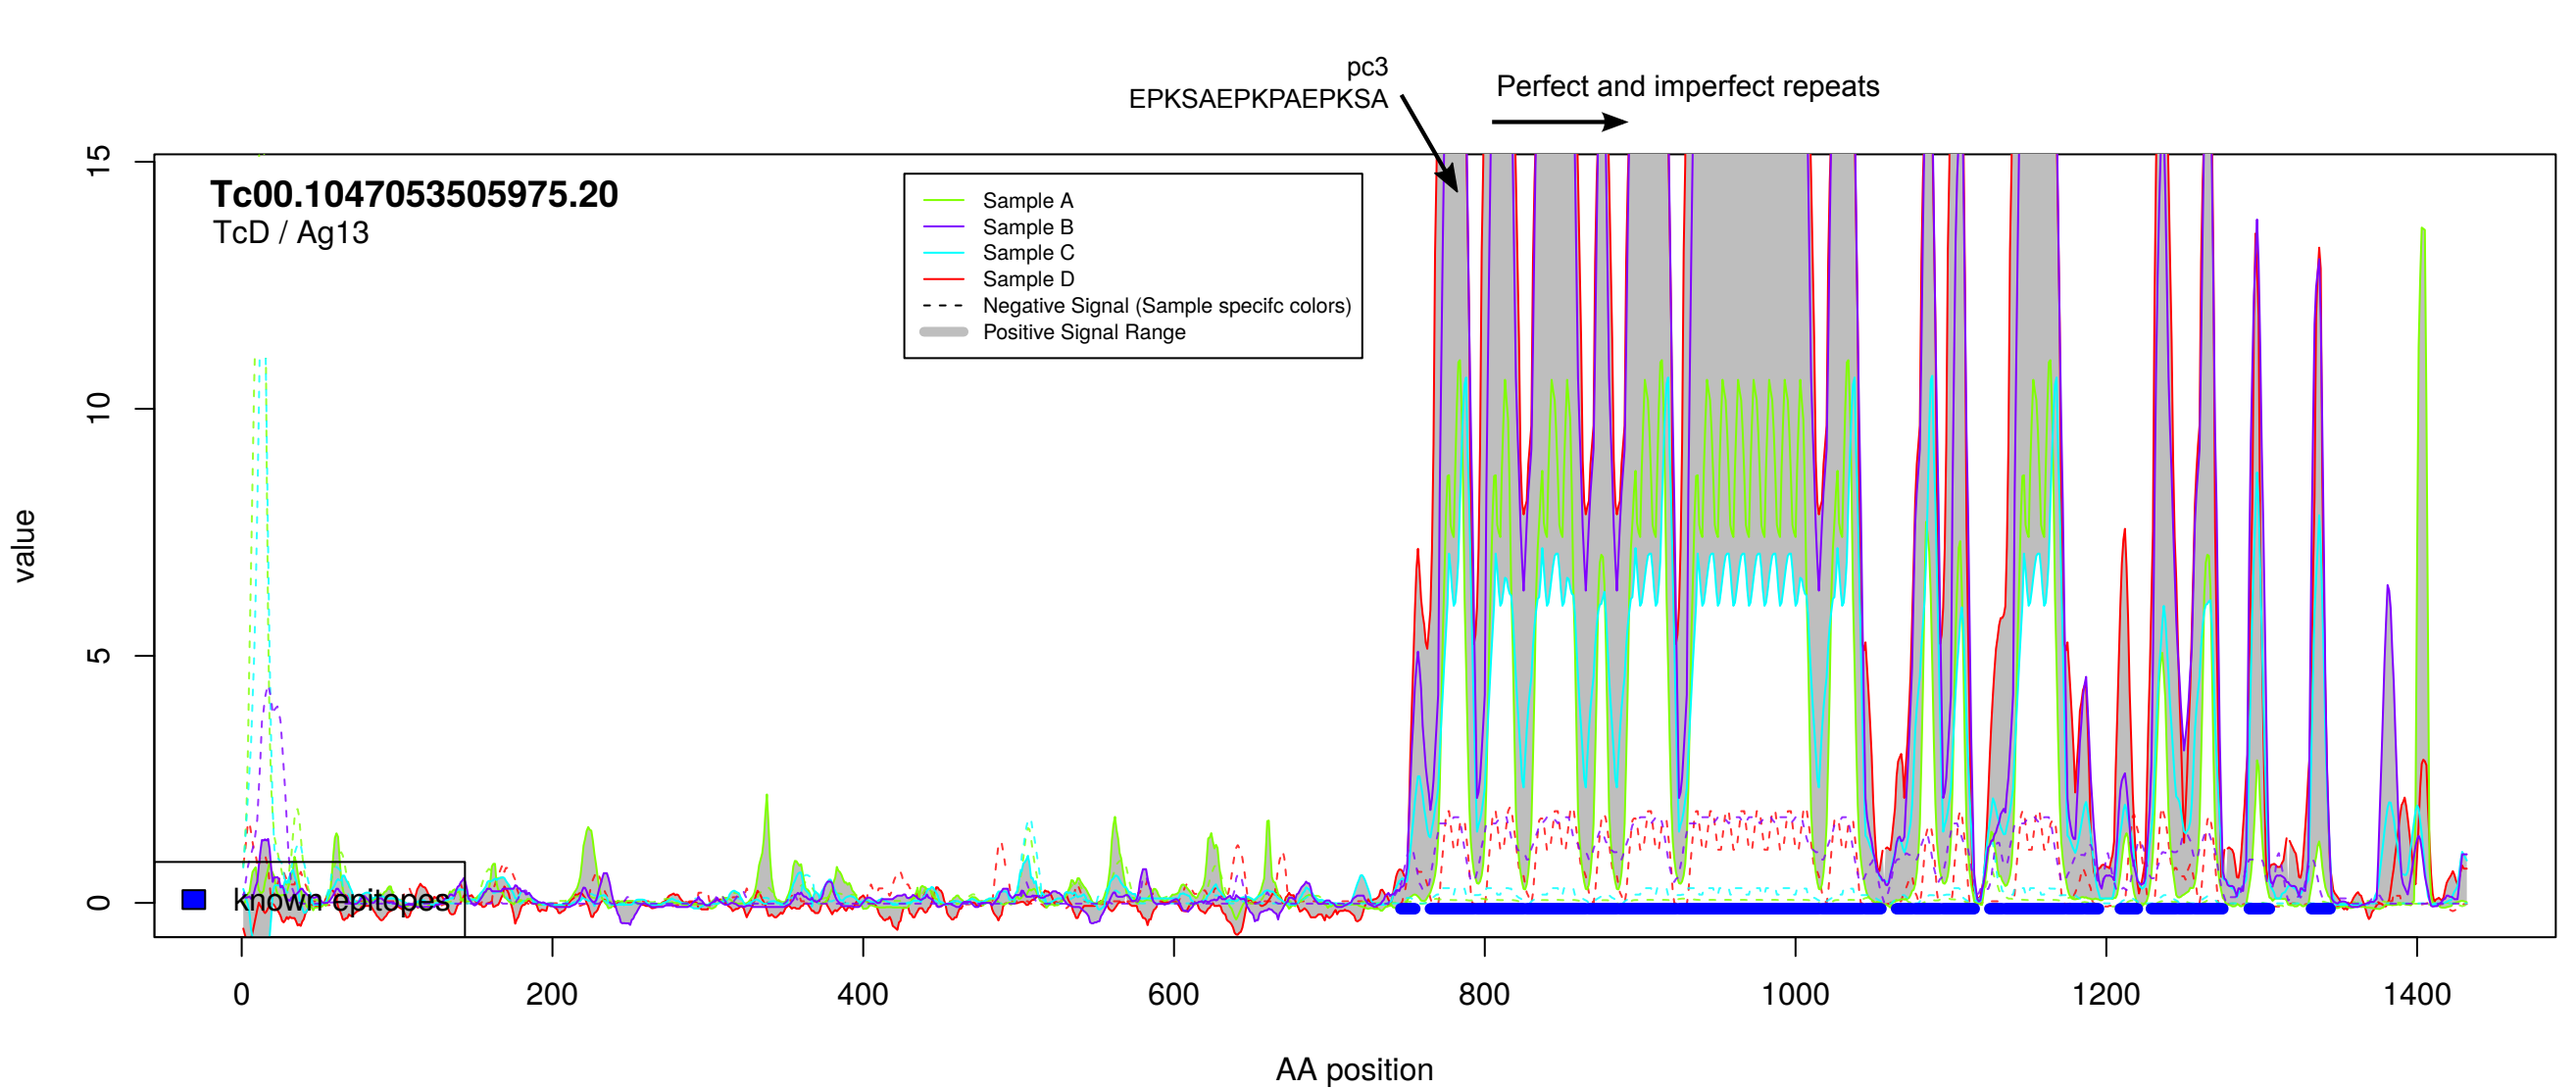

Supplement: pntd.0005972.s001.pdf [file pntd.0005972.s001.pdf]
