# Supplementary material for: Next-generation ELISA diagnostic assay for Chagas Disease based on the combination of short peptidic epitopes
Source: PubMed Central journal article supplement (PMC5648266; doi:10.1371/journal.pntd.0005972), 2017-10-09

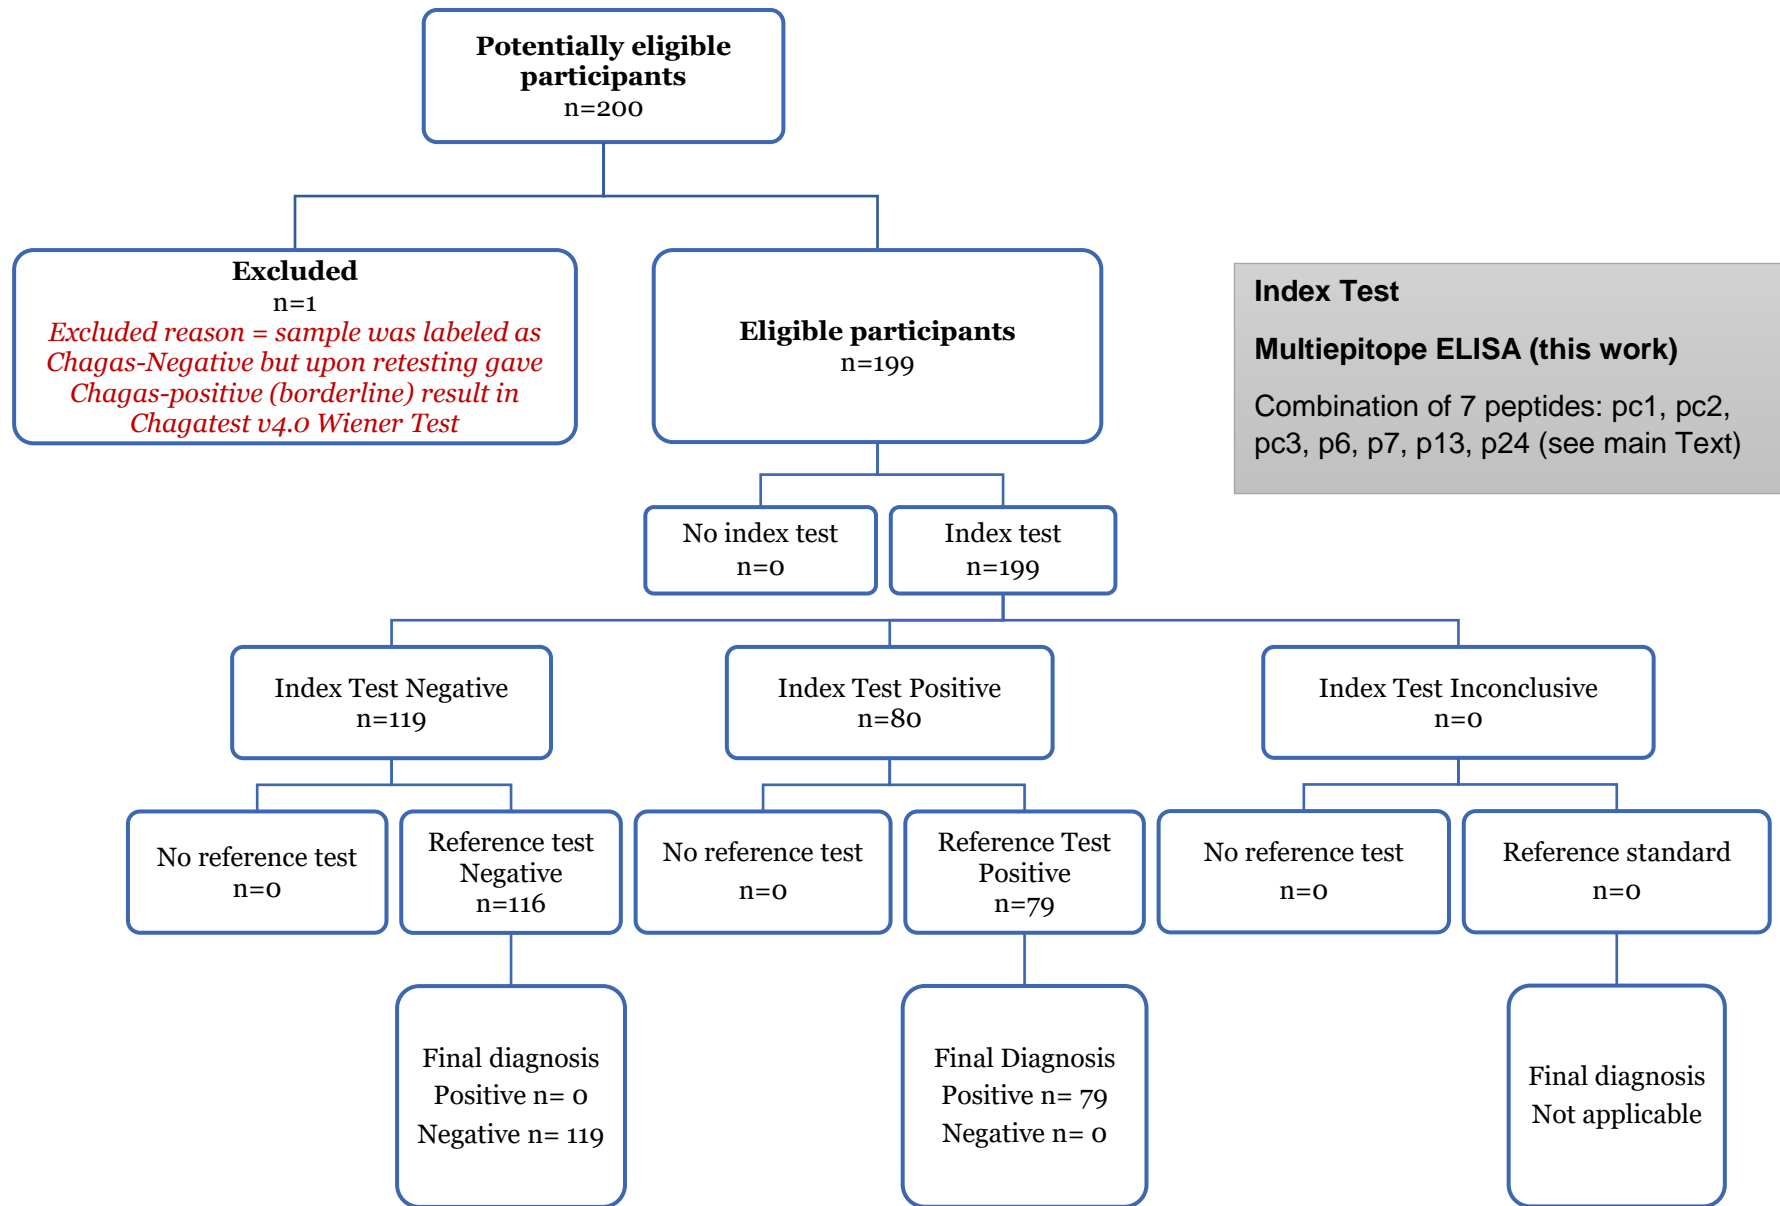

Supplement: pntd.0005972.s003.pdf [file pntd.0005972.s003.pdf]
