# Supplementary material for: Next-generation ELISA diagnostic assay for Chagas Disease based on the combination of short peptidic epitopes
Source: PubMed Central journal article supplement (PMC5648266; doi:10.1371/journal.pntd.0005972), 2017-10-09
Supplement: pntd.0005972.s005.pdf [file pntd.0005972.s005.pdf]

**S2 Table – STARD Checklist for reporting studies of diagnostic accuracy**

| Section & Topic          | No         | Item                                                                                                                                                   | Reported on page #                                                        |
|--------------------------|------------|--------------------------------------------------------------------------------------------------------------------------------------------------------|---------------------------------------------------------------------------|
| <b>TITLE OR ABSTRACT</b> |            |                                                                                                                                                        |                                                                           |
|                          | <b>1</b>   | Identification as a study of diagnostic accuracy using at least one measure of accuracy (such as sensitivity, specificity, predictive values, or AUC)  | 2, Abstract                                                               |
| <b>ABSTRACT</b>          |            |                                                                                                                                                        |                                                                           |
|                          | <b>2</b>   | Structured summary of study design, methods, results, and conclusions (for specific guidance, see STARD for Abstracts)                                 | 2, Abstract                                                               |
| <b>INTRODUCTION</b>      |            |                                                                                                                                                        |                                                                           |
|                          | <b>3</b>   | Scientific and clinical background, including the intended use and clinical role of the index test                                                     | 4, Introduction                                                           |
|                          | <b>4</b>   | Study objectives and hypotheses                                                                                                                        | 4, Introduction                                                           |
| <b>METHODS</b>           |            |                                                                                                                                                        |                                                                           |
| <i>Study design</i>      | <b>5</b>   | Whether data collection was planned before the index test and reference standard were performed (prospective study) or after (retrospective study)     | 7,8<br>Retrospective Study                                                |
| <i>Participants</i>      | <b>6</b>   | Eligibility criteria                                                                                                                                   | 7,8                                                                       |
|                          | <b>7</b>   | On what basis potentially eligible participants were identified (such as symptoms, results from previous tests, inclusion in registry)                 | 7,8                                                                       |
|                          | <b>8</b>   | Where and when potentially eligible participants were identified (setting, location and dates)                                                         | 7,8                                                                       |
|                          | <b>9</b>   | Whether participants formed a consecutive, random or convenience series                                                                                | 7,8<br>Convenience series                                                 |
| <i>Test methods</i>      | <b>10a</b> | Index test, in sufficient detail to allow replication                                                                                                  | 6 (Table 1), 13 Results (final peptide combination)                       |
|                          | <b>10b</b> | Reference standard, in sufficient detail to allow replication                                                                                          | 7,8 (Chagatest v4.0 Wiener Labs)                                          |
|                          | <b>11</b>  | Rationale for choosing the reference standard (if alternatives exist)                                                                                  | 16, Discussion<br>Availability in Argentina, widespread use elsewhere     |
|                          | <b>12a</b> | Definition of and rationale for test positivity cut-offs or result categories of the index test, distinguishing pre-specified from exploratory         | 9, Methods, Data Analysis                                                 |
|                          | <b>12b</b> | Definition of and rationale for test positivity cut-offs or result categories of the reference standard, distinguishing pre-specified from exploratory | Brochure of the manufacturer                                              |
|                          | <b>13a</b> | Whether clinical information and reference standard results were available to the performers/readers of the index test                                 | 7,8 (Methods)<br>YES                                                      |
|                          | <b>13b</b> | Whether clinical information and index test results were available to the assessors of the reference standard                                          | NO                                                                        |
| <i>Analysis</i>          | <b>14</b>  | Methods for estimating or comparing measures of diagnostic accuracy                                                                                    | 9 (Methods, Data analysis)                                                |
|                          | <b>15</b>  | How indeterminate index test or reference standard results were handled                                                                                | 9 (Methods, Data analysis)<br>No indeterminates                           |
|                          | <b>16</b>  | How missing data on the index test and reference standard were handled                                                                                 | Not applicable                                                            |
|                          | <b>17</b>  | Any analyses of variability in diagnostic accuracy, distinguishing pre-specified from exploratory                                                      |                                                                           |
|                          | <b>18</b>  | Intended sample size and how it was determined                                                                                                         | 8 (Methods)<br>>73 Chagas positive samples<br>>73 Chagas-negative samples |
| <b>RESULTS</b>           |            |                                                                                                                                                        |                                                                           |
| <i>Participants</i>      | <b>19</b>  | Flow of participants, using a diagram                                                                                                                  | S3 Figure                                                                 |
|                          | <b>20</b>  | Baseline demographic and clinical characteristics of participants                                                                                      |                                                                           |
|                          | <b>21a</b> | Distribution of severity of disease in those with the target condition                                                                                 | 7,8 (Methods)                                                             |

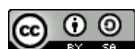

**S2 Table – STARD Checklist for reporting studies of diagnostic accuracy**

|                          |            |                                                                                                             |                                                                                |
|--------------------------|------------|-------------------------------------------------------------------------------------------------------------|--------------------------------------------------------------------------------|
|                          |            |                                                                                                             | Chagas (n=80) all asymptomatic without cardiac or gastrointestinal compromise. |
|                          | <b>21b</b> | Distribution of alternative diagnoses in those without the target condition                                 | Not applicable                                                                 |
|                          | <b>22</b>  | Time interval and any clinical interventions between index test and reference standard                      | Not applicable. Samples from sera bank collection                              |
| <i>Test results</i>      | <b>23</b>  | Cross tabulation of the index test results (or their distribution) by the results of the reference standard | S1 Table                                                                       |
|                          | <b>24</b>  | Estimates of diagnostic accuracy and their precision (such as 95% confidence intervals)                     | 13, 14; Table 3                                                                |
|                          | <b>25</b>  | Any adverse events from performing the index test or the reference standard                                 | None                                                                           |
| <b>DISCUSSION</b>        |            |                                                                                                             |                                                                                |
|                          | <b>26</b>  | Study limitations, including sources of potential bias, statistical uncertainty, and generalisability       | 17                                                                             |
|                          | <b>27</b>  | Implications for practice, including the intended use and clinical role of the index test                   | Proof of concept, Feasibility study                                            |
| <b>OTHER INFORMATION</b> |            |                                                                                                             |                                                                                |
|                          | <b>28</b>  | Registration number and name of registry                                                                    | Not applicable                                                                 |
|                          | <b>29</b>  | Where the full study protocol can be accessed                                                               | 7                                                                              |
|                          | <b>30</b>  | Sources of funding and other support; role of funders                                                       | In submission form                                                             |
